# Supplementary material for: Water formation on interstellar silicates: the role of Fe2+/H2 interactions in the O + H2 → H2O reaction
Source: Royal Society of Chemistry journal article supplement (doi:10.1039/d2cp04051d), 2022-01-01
Supplement: d2cp04051d1.pdf [file d2cp04051d1.pdf]

Electronic Supplementary Information (ESI)

**Water Formation on Interstellar Silicates: Role of  
Fe<sup>2+</sup>/H<sub>2</sub> interactions in the O + H<sub>2</sub> → H<sub>2</sub>O reaction**

Marc Serra-Peralta, Christian Domínguez-Dalmases, and Albert Rimola\*

*Departament de Química, Universitat Autònoma de Barcelona, 08193*

*Bellaterra, Catalonia, Spain*

E-mail corresponding autor: [albert.rimola@uab.cat](mailto:albert.rimola@uab.cat)

**Table S1.** Lattice parameters ( $a$ ,  $b$  in Å, and  $\gamma$  in degrees) of the B3LYP-D3(BJ)-optimized surfaces for the Mg<sub>2</sub>SO<sub>4</sub> and (Mg,Fe)SiO<sub>4</sub> systems.

| Surface     | $a$        | $b$         | $\gamma$  |
|-------------|------------|-------------|-----------|
| (010)-Mg    | 4.78095    | 12.16320    | 90.07227  |
| (010)-Fe1 Q | 4.74823328 | 12.08573786 | 89.999270 |
| (010)-Fe1 T | 4.74514896 | 12.09325602 | 89.986586 |
| (010)-Fe1 S | 4.74750442 | 12.07195125 | 89.956311 |
| (001)-Mg    | 4.75996    | 9.78703     | 91.60683  |
| (001)-Fe1 Q | 4.76836083 | 9.78889719  | 91.673278 |
| (001)-Fe1 T | -          | -           | -         |
| (001)-Fe1 S | 4.75630825 | 9.77261366  | 91.788967 |
| (001)-Fe4 Q | 4.76946787 | 9.78397288  | 91.713665 |
| (001)-Fe4 T | 4.75818705 | 9.78456149  | 91.490428 |
| (001)-Fe4 S | 4.75298384 | 9.76232226  | 91.399307 |
| (110)-Mg    | 5.72247    | 11.29350    | 91.71496  |
| (110)-Fe2 Q | 5.73526375 | 11.34338253 | 91.731749 |
| (110)-Fe2 T | 5.72251573 | 11.33914547 | 91.811724 |
| (110)-Fe2 S | 5.78335657 | 11.28458030 | 91.688910 |
| (110)-Fe8 Q | 5.73563564 | 11.36520956 | 91.718696 |
| (110)-Fe8 T | 5.75680944 | 11.34386635 | 91.782465 |
| (110)-Fe8 S | 5.70216835 | 11.37243813 | 91.786953 |

# Rate Constants Description with Tunneling Effects

The classical rate constant is given by the Eyring equation [1]

$$k_{classical}(T) = \frac{k_B T}{h} e^{-\Delta G^\ddagger/k_B T}. \quad (\text{A.1})$$

In general, this variable is represented in an Arrhenius plot:  $\ln k$  vs  $1/T$ ,

$$\ln k = \ln \left( \frac{k_B T}{h} \right) - \frac{\Delta G^\ddagger}{k_B} \cdot \frac{1}{T}. \quad (\text{A.2})$$

In order to include the tunneling effect, the semi-classical rate constant is defined as

$$k_{SC}(T) = \kappa(T) k_{classical}(T), \quad (\text{A.3})$$

where  $\kappa(T)$  is the transmission coefficient that depends on the transmission probability of the tunneling effect [2]. The analytic expression of this coefficient is different depending on the potential barrier approximation used. However, its general equation is

$$\kappa(T) = \frac{\int_{E_0}^{+\infty} P^T(E) e^{-\beta E} dE}{\int_{E_0}^{+\infty} P^C(E) e^{-\beta E} dE}, \quad (\text{A.4})$$

where  $\beta = 1/k_B T$ ,  $P^T(E)$  is the quantum transmission probability,  $P^C(E)$  is the classical transmission probability and  $E_0 = \max(E_r, E_p)$  with  $E_r$  the reactant's energy and  $E_p$  the product's energy [2]. It is very important that all the energies include the Zero Point Energy (ZPE) and they must have the same energy origin.

The Variational Transition State Theory (VTST) states that the classical transmission probability is given by

$$P^C(E) = H(E - E^\ddagger), \quad (\text{A.5})$$

where  $E^\ddagger$  stands for the maximum energy of the potential barrier and  $H(x)$  is the Heaviside step function [2]. Thus, the transmission coefficient results in

$$\kappa(T) = \beta e^{\beta E^\ddagger} \int_{E_0}^{+\infty} P^T(E) e^{-\beta E} dE. \quad (\text{A.6})$$

In the next sections, the following 1D potentials are studied:

- Asymmetric squared barrier
- Asymmetric truncated parabolic barrier
- Asymmetric and approximated Eckart barrier
- General potential barrier

In general, the uni-dimensional potential barrier underestimates the transmission coefficient because it does not take into account the curvature of the reaction path.

## A.1 Theoretical Description of the Potential Barriers

In this section, the potential barriers and their transmission coefficients are described. The characteristic parameters and some approximations are also included.

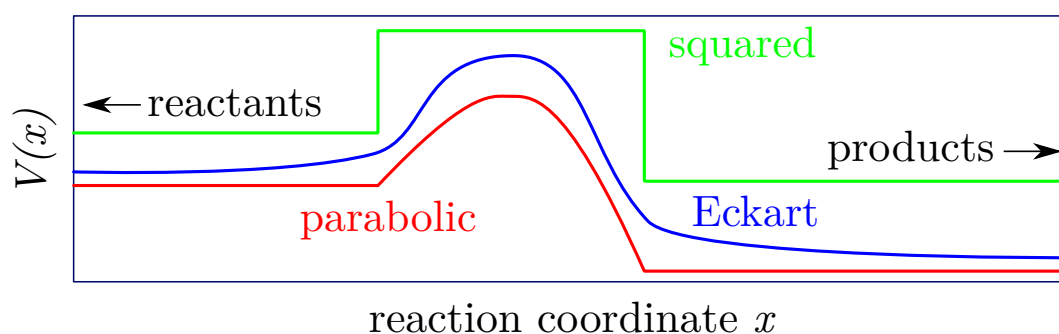

**Fig. S1** | Symbolic representation of the described potentials.

### A.1.1 Asymmetric Squared Barrier

Potential:

$$V(x) = \begin{cases} E_r & x \leq 0 \\ E^\ddagger & 0 < x \leq l \\ E_p & l < x \end{cases} \quad (\text{A.7})$$

where  $l$  is the barrier's width. This parameter can be estimated from the characteristic length of the parabolic or Eckart potential:

$$l_{parabolic} = \sqrt{\frac{V_{max}}{2\pi^2\mu|\nu^\ddagger|^2}} + \sqrt{\frac{V_{max} - \Delta V}{2\pi^2\mu|\nu^\ddagger|^2}} \quad (\text{A.8})$$

$$l_{Eckart} = \frac{1}{|\nu^\ddagger|} \sqrt{\frac{2}{\mu}} \left( \frac{1}{\sqrt{V_r}} + \frac{1}{\sqrt{V_f}} \right)^{-1} \quad (\text{A.9})$$

where  $\nu^\ddagger$  is the imaginary frequency of the transition state (TS),  $\mu$  is the reduced mass associated to this mode,  $V_{max} = E^\ddagger - E_r$ ,  $\Delta V = E_p - E_r$ ,  $V_f = E^\ddagger - E_r$  and  $V_r = E^\ddagger - E_p$  [2,3,4]. It is worth mentioning here that some formulae in [2] are not correct). The nomenclature  $V_r$  and  $V_f$  corresponds to *reverse* and *forward*, respectively, and  $r$  should not be confused with 'reactants'.

Using the expressions of subsection A.1.4, it can be noticed that  $s_1 = 0$  and  $s_2 = l$ , so

$$\theta(E) = \frac{\sqrt{2\mu}}{\hbar} \int_0^l \sqrt{E^\ddagger - E} dx = \frac{l}{\hbar} \sqrt{2\mu(E^\ddagger - E)}. \quad (\text{A.10})$$

Then, the transmission probability can be written as

$$P_{squared}(E) = \begin{cases} 0 & E \leq E_0 \\ \left(1 + e^{2\theta(E)}\right)^{-1} & E_0 < E \leq E^\ddagger \\ 1 - \left(1 + e^{2\theta(2E^\ddagger - E)}\right)^{-1} & E^\ddagger < E \leq 2E^\ddagger - E_0 \\ 1 & 2E^\ddagger - E_0 < E \end{cases} \quad (\text{A.11})$$

In order to determine the transmission coefficient, the following integral has to be computed

$$I \equiv \int_{E_0}^{+\infty} P_{squared}(E) e^{-\beta E} dE \equiv I_1 + I_2 + I_3, \quad (\text{A.12})$$

where

$$I_3 = \int_{2E^\ddagger - E_0}^{+\infty} e^{-\beta E} dE = \frac{1}{\beta} e^{-\beta(2E^\ddagger - E_0)} \quad (\text{A.13})$$

and  $I_1$  and  $I_2$  have to be numerically integrated.

### A.1.2 Asymmetric Parabolic Barrier

Potential:

$$V(x) = \begin{cases} 0 & x \leq -\sqrt{\frac{V_{max}}{2\pi^2\mu|\nu^\ddagger|^2}} \\ V_{max} - 2\pi^2\mu|\nu^\ddagger|^2 x^2 & -\sqrt{\frac{V_{max}}{2\pi^2\mu|\nu^\ddagger|^2}} < x \leq \sqrt{\frac{V_{max} - \Delta V}{2\pi^2\mu|\nu^\ddagger|^2}} \\ \Delta V & \sqrt{\frac{V_{max} - \Delta V}{2\pi^2\mu|\nu^\ddagger|^2}} < x \end{cases} \quad (\text{A.14})$$

where  $\nu^\ddagger$  is the imaginary frequency of the TS,  $\mu$  is the reduced mass associated with this mode,  $V_{max} = E^\ddagger - E_r$  and  $\Delta V = E_p - E_r$  [2]. It is important to notice that this potential has its energy origin on the reactants,  $V(x \rightarrow -\infty) = 0$ .

The transmission coefficient is found to be

$$\kappa(T) = \begin{cases} \frac{\pi/K}{\sin(\pi/K)} + \exp\left[(1-K) \frac{V_b}{k_B T}\right] / (1-K) & K > 1 \\ V_b / k_B T & K = 1 \\ \left(\exp\left[(1-K) \frac{V_b}{k_B T}\right] - 1\right) / (1-K) & K > 1 \end{cases} \quad (\text{A.15})$$

where  $K = 2\pi k_B T / h |\nu^\ddagger|$  and  $V_b = V_{max} - \max(0, \Delta V)$  [2].

### A.1.3 Asymmetric Eckart Barrier

Potential:

$$V(x) = \frac{Ae^{(x-x_0)/l}}{1 + e^{(x-x_0)/l}} + \frac{Be^{(x-x_0)/l}}{(1 + e^{(x-x_0)/l})^2} \quad (\text{A.16})$$

where

$$\begin{aligned} A &= V_f - V_r \\ B &= \left( \sqrt{V_r} + \sqrt{V_f} \right)^2 \\ l &= \frac{1}{|\nu^\ddagger|} \sqrt{\frac{2}{\mu}} \left( \frac{1}{\sqrt{V_r}} + \frac{1}{\sqrt{V_f}} \right)^{-1} \\ x_0 &= \frac{l}{2} \ln(1 - \Delta V/V_{max}) \quad \text{corresponds to the position of the maximum of the potential} \end{aligned} \quad (\text{A.17})$$

with  $V_{max} = E^\ddagger - E_r$ ,  $\Delta V = E_p - E_r$ ,  $V_f = E^\ddagger - E_r$  and  $V_r = E^\ddagger - E_p$  [2,4]. The nomenclature of  $V_r$  and  $V_f$  is the *reverse* and *forward* potential, respectively. It is important to notice that the potential has its energy origin on the reactants,  $V(x \rightarrow -\infty) = 0$ .

The transmission probability is given by

$$P_{Eckart}(E) = \frac{\cosh(a + b) - \cosh(a - b)}{\cosh(a + b) + \cosh(d)}, \quad (\text{A.18})$$

where

$$\begin{aligned} a &= \frac{4\pi}{h|\nu^\ddagger|} \left( \frac{1}{\sqrt{V_r}} + \frac{1}{\sqrt{V_f}} \right)^{-1} \sqrt{E} \\ b &= \frac{4\pi}{h|\nu^\ddagger|} \left( \frac{1}{\sqrt{V_r}} + \frac{1}{\sqrt{V_f}} \right)^{-1} \sqrt{E - V_f + V_r} \\ d &= 4\pi \sqrt{\frac{V_f V_r}{(h|\nu^\ddagger|)^2} - \frac{1}{16}} \end{aligned} \quad (\text{A.19})$$

as described in [2,4].

The expression of the transmission coefficient is

$$\kappa(T) = \beta e^{\beta E^\ddagger} \int_{E_0}^{+\infty} P_{Eckart}(E - E_r) e^{-\beta E} dE \quad (\text{A.20})$$

because the energy origin of  $P_{Eckart}(E)$  is different from the integral variables. For example, when in the integral  $E = E_r$ , then  $P(E_r - E_r) = P(0)$  that agrees with the energy origin of the Eckart potential. Moreover, as the minimum value of  $E$  in the integral is  $E_0 = \max(E_r, E_p)$ , there will be no problem in evaluating  $\sqrt{E - E_r}$  or  $\sqrt{E - E_r - V_f + V_r}$  when  $E \in [E_0, +\infty)$  as

- $\sqrt{E - E_r}$ ,  $E - E_r \geq 0$  because  $E \in [\max(E_r, E_p), +\infty)$
- $\sqrt{E - E_r - V_f + V_r} = \sqrt{E - E_r - E_p + E_r} = \sqrt{E - E_p}$ ,  $E - E_p \geq 0$  for the same reason.

In addition, certain approximations can be done to simplify the calculations of  $\kappa(T)$  [2]. Assuming that the barrier is symmetric ( $\Delta V = 0$ ) and that it is very high or wide, in other words

$$\gamma = \frac{2\pi V_{max}}{h|\nu^\ddagger|} \gg 1, \quad (\text{A.21})$$

then the transmission coefficient can be approximated to

$$\kappa(T) = \frac{h|\nu^\ddagger|}{2\pi k_B T} \int_{-\gamma}^{+\infty} \frac{\exp[-h|\nu^\ddagger|x/2\pi k_B T]}{1 + \exp[2\gamma(1 - \sqrt{1 + x/\gamma})]} dx \quad (\text{A.22})$$

where  $x = \gamma(E - E_{max})/V_{max}$ .

Moreover, assuming also high temperatures (i.e.  $2\pi k_B T/h|\nu^\ddagger| \gg 1$ ) leads to the analytical expression

$$\kappa(T) = \frac{h|\nu^\ddagger|/2k_B T}{\sin(h|\nu^\ddagger|/2k_B T)}. \quad (\text{A.23})$$

Finally, this expression can be simplified in order to obtain the Wigner tunneling expression

$$\kappa(T) = 1 + \frac{1}{24} \left( \frac{h|\nu^\ddagger|}{k_B T} \right)^2. \quad (\text{A.24})$$



### A.1.4 General Potential Barrier

Potential: any  $V(x)$  that fulfills  $V(x \rightarrow -\infty) = E_r$  and  $V(x \rightarrow +\infty) = E_p$ .

This general barrier is a zero-curvature tunneling model (ZCT), which uses the semi-classical WKB approximation. The model is considered multidimensional if the potential includes all the vibrational ZPE in the orthogonal directions of the reaction path [2].

The transmission probability is given by

$$P_{ZCT}(E) = \begin{cases} 0 & E \leq E_0 \\ \left(1 + e^{2\theta(E)}\right)^{-1} & E_r < E \leq E^\ddagger \\ 1 - \left(1 + e^{2\theta(2E^\ddagger - E)}\right)^{-1} & E^\ddagger < E \leq 2E^\ddagger - E_0 \\ 1 & 2E^\ddagger - E_0 < E \end{cases} \quad (\text{A.25})$$

where

$$\theta = \frac{1}{\hbar} \int_{s_1}^{s_2} \sqrt{2\mu(V(x) - E)} dx \quad (\text{A.26})$$

with  $s_1$  and  $s_2$  being the crossing points between  $V(x)$  and  $E$ . In other words, they are the points that fulfill  $V(s_1) = E = V(s_2)$ .

The transmission coefficient is then

$$\kappa(T) = \beta e^{\beta E^\ddagger} \int_{E_0}^{+\infty} P_{ZCT}(E) e^{-\beta E} dE. \quad (\text{A.27})$$

The ZCT underestimates the transmission by tunneling effect because it does not take into account the curvature of the reaction path. In [2], several sophisticated methods are described, such as small-curvature tunneling, large-curvature tunneling, microcanonically optimized tunneling and least-action tunneling.

## References

- [1] H. Eyring, *J. Chem. Phys.*, 1935, **3**, 107.
- [2] J. L. Bao and D. G. Truhlar, *Chem. Soc. Rev.*, 2017, **46**, 7548.
- [3] V. Taquet, P. S. Peters, C. Kahane, C. Ceccarelli, A. Lopez-Sepulcre, C. Toubin, D. Duflot and L. Wiesenfeld, *Astron. Astrophys.*, 2013, **550**, A127.
- [4] P. S. Peters, D. Duflot, A. Faure, C. Kahane, C. Ceccarelli, L. Wiesenfeld and C. Toubin, *J. Phys. Chem. A*, 2011, **115**, 8983.

## Fractionary coordinates of the periodic systems

Optimized fractionary coordinates have been written in the MOLDRAW format (MOLDRAW is freely available at <http://www.moldraw.unito.it>). Each coordinates block starts with a TITLE record and finishes with a “-1 0 0 0” record. The coordinates of each structure can be copied and pasted in an ASCII editor and saved as a file with .mol extension.

```
TITLE
001-Fe1_Q
CELL
4.7683608300 9.7888971900 1.0000000000 90.000000 90.000000 91.673278
COORD
26 0.447700158525301 0.4362046215325 4.259774285481
8 0.237467618488301 0.6285470678731 4.372809279654
8 0.404519901061701 0.2387782244725 4.155786161671
12 6.41399810204704E-03 0.2571621397685 2.580672026663
12 0.484310338249601 0.7730266207691 3.028743660196
14 0.465165628272901 0.1056671904041 3.171852942587
14 0.054556754538221 0.5888778917432 3.058482200871
8 0.799230493237201 9.27525577829204E-02 3.02780721726701
8 0.713703528135201 0.5833989343853 3.120709641112
8 0.172195665663601 0.4357991707988 2.75246393170201
8 0.319437335739701 0.9524242443954 3.357189599397
8 0.298233904549001 0.1491649477955 1.741029990518
8 0.205695958914901 0.6710004441434 1.792193211958
12 0.028409403404521 0.98214270700527 1.807623256878
12 0.486802753746201 0.5031092235589 1.497606598686
8 0.749035374776901 0.3341776477682 1.259362031673
8 0.726421901344901 0.8324437581202 1.415560608082
12 9.13309889626807E-03 0.7277465687251 6.86183962383137E-02
12 0.484618117886001 0.2166853867296 4.70459750674338E-02
14 0.580757877490301 0.90791387467433 0.120129933991504
14 0.916604999900121 0.4077064657237 9.49529287981381E-03
8 0.239982355939901 0.90868951333338 0.124662913243504
8 0.255680666032301 0.4084983746002 3.39268894534139E-02
8 0.769896849410101 0.5590921790596 7.64080532982837E-02
8 0.738790633853301 5.86073441888803E-02 6.68521289253238E-02
8 0.726991923514401 0.8342777380538 -1.181525561152
8 0.765818773327901 0.338876859522 -1.305139635622
12 0.999556380878967 6.76113153316386E-05 -1.407491653547
12 0.499649333524001 0.5007951969607 -1.396223829025
8 0.232914333555101 0.6616107644475 -1.499621918266
8 0.272040773944701 0.1660112296864 -1.632747195025
12 0.990351474925921 0.2723591783336 -2.871133290328
12 0.513858799448401 0.783939202799601 -2.865094098941
14 0.418729476664701 9.25081631130504E-02 -2.93546682884
14 0.082736521394011 0.5926233056184 -2.814165300207
8 0.759465004329201 9.19682018931303E-02 -2.936348965505
8 0.743583029787101 0.591430535799 -2.833552455407
8 0.229469403316801 0.4410187566359 -2.872736730332
8 0.260078375022601 0.94205524471736 -2.880553922377
8 0.274068824246301 0.1685644434683 -4.231113934843
8 0.248506384080101 0.665484444466 -4.070041628328
12 0.971222545505031 1.75921363782903E-02 -4.624676604651
12 0.514942102763001 0.4952053548972 -4.27496344604
8 0.797085113850701 0.3287214952878 -4.606226200472
8 0.699872838735301 0.8516779168825 -4.548147857283
```

|    |                   |                      |                 |
|----|-------------------|----------------------|-----------------|
| 12 | 0.988311065361351 | 0.7428799843459      | -5.395808394195 |
| 12 | 0.519169460968401 | 0.2260428217871      | -5.837739661551 |
| 14 | 0.534129526035201 | 0.8934425656107      | -5.995634719938 |
| 14 | 0.946678738269881 | 0.4121818708394      | -5.86988930462  |
| 8  | 0.200004332283201 | 0.90678529220404     | -5.838452806897 |
| 8  | 0.288854045709001 | 0.4218516635485      | -5.939304185909 |
| 8  | 0.820640342879801 | 0.5635665951914      | -5.567648418578 |
| 8  | 0.679887748758201 | 4.73136254632403E-02 | -6.17343917423  |
| 8  | 0.598629295375401 | 0.7619440016765      | -6.973641561907 |
| 8  | 0.771342822046501 | 0.3693050647863      | -7.199742904453 |
| 12 | 0.556645893346201 | 0.5582816349171      | -7.057698871506 |

-1 0 0 0  
GROUP  
P1

TITLE  
001-Fe1\_s  
CELL  
4.7563082500 9.7726136600 1.0000000000 90.000000 90.000000 91.788967  
COORD

|    |                      |                      |                      |
|----|----------------------|----------------------|----------------------|
| 26 | 0.453229313970599    | 0.4367291232185      | 4.189038887772       |
| 8  | 0.243074044642299    | 0.636264218352       | 4.354786545097       |
| 8  | 0.411711911623899    | 0.2407826426475      | 4.156297155973       |
| 12 | 2.77522876715844E-03 | 0.2585172650509      | 2.612588512205       |
| 12 | 0.479040034537999    | 0.7743936062055      | 3.042832620526       |
| 14 | 0.463380364176299    | 0.1068900461833      | 3.167092870181       |
| 14 | 5.56182097221194E-02 | 0.5890026648274      | 3.081872065777       |
| 8  | 0.797472058239199    | 9.23767838963698E-02 | 3.020701666025       |
| 8  | 0.712252160040899    | 0.5773440409196      | 3.138383958423       |
| 8  | 0.185779026114999    | 0.4355134001714      | 2.821941967237       |
| 8  | 0.314772367781499    | 0.95395570785433     | 3.347925217602       |
| 8  | 0.296011927455799    | 0.151440342337       | 1.739206312158       |
| 8  | 0.201585128838199    | 0.6681220672154      | 1.78140982799        |
| 12 | 2.59334714092995E-02 | 0.9837856692064      | 1.797791814623       |
| 12 | 0.488787343195299    | 0.5036837578656      | 1.491837791153       |
| 8  | 0.753441307975899    | 0.3354900720462      | 1.264731539132       |
| 8  | 0.723995864470499    | 0.8312930019209      | 1.419909739736       |
| 12 | 8.94906203479045E-03 | 0.727680055593       | 0.064635373290091    |
| 12 | 0.484989234549599    | 0.2167460030782      | 0.051350192745741    |
| 14 | 0.580137425498799    | 0.9074432376863      | 0.123125721345601    |
| 14 | 0.917612048419669    | 0.4079587542657      | 2.68969045467522E-03 |
| 8  | 0.238798172099799    | 0.90883221682074     | 0.124163679342301    |
| 8  | 0.257112594685299    | 0.4089704968583      | 3.89547437950712E-02 |
| 8  | 0.769815248481099    | 0.5592555588444      | 6.33870531599811E-02 |
| 8  | 0.739293697576399    | 5.84195358707798E-02 | 0.073691258955401    |
| 8  | 0.726473849294099    | 0.8343349799609      | -1.181691710235      |
| 8  | 0.765982746530599    | 0.3384206795288      | -1.306223519192      |
| 12 | 0.999451472037795    | 0.999933287210061    | -1.409266708257      |
| 12 | 0.498741388559399    | 0.5007279499175      | -1.396735035369      |
| 8  | 0.233016915449499    | 0.6623152103936      | -1.510741978494      |
| 8  | 0.272878108987699    | 0.1658709037404      | -1.636319384247      |
| 12 | 0.990391672959961    | 0.271693089248       | -2.870220955285      |
| 12 | 0.513866081188699    | 0.7837159998022      | -2.867074461152      |
| 14 | 0.418917681316699    | 9.23312732049398E-02 | -2.942004549378      |
| 14 | 8.22553813017095E-02 | 0.5927257921797      | -2.822649250978      |
| 8  | 0.760174055946399    | 9.12304130658598E-02 | -2.937940562245      |
| 8  | 0.742612641983399    | 0.591254665403       | -2.835117199869      |
| 8  | 0.228477442007799    | 0.440719829414       | -2.871148782862      |

|    |                   |                      |                 |
|----|-------------------|----------------------|-----------------|
| 8  | 0.258849672975899 | 0.94171882093303     | -2.890482632303 |
| 8  | 0.275327823299199 | 0.1688637934523      | -4.238387034998 |
| 8  | 0.248777778137699 | 0.664774156583       | -4.082373433887 |
| 12 | 0.971841525831559 | 1.70851973393298E-02 | -4.626426035769 |
| 12 | 0.514213429035499 | 0.4938047810149      | -4.267041190642 |
| 8  | 0.797219073453899 | 0.3281246212568      | -4.597571268837 |
| 8  | 0.700296198318599 | 0.8511210356628      | -4.546804014284 |
| 12 | 0.987909405421979 | 0.7418350328404      | -5.411156971164 |
| 12 | 0.521026902347399 | 0.2260504811797      | -5.855728102362 |
| 14 | 0.534214804065799 | 0.8920979415313      | -5.995050178303 |
| 14 | 0.946141974859589 | 0.4118544695569      | -5.861612235886 |
| 8  | 0.199434753903499 | 0.90645073471301     | -5.843963637983 |
| 8  | 0.288661137139899 | 0.4239830841917      | -5.94441059215  |
| 8  | 0.818342830103699 | 0.5628700766574      | -5.559867215911 |
| 8  | 0.680553736776899 | 4.63789300074698E-02 | -6.182504176908 |
| 8  | 0.594993501076899 | 0.7592379304902      | -6.96186454635  |
| 8  | 0.769720149893399 | 0.3698152781896      | -7.18819633489  |
| 12 | 0.553668619491299 | 0.5577692923935      | -7.018937336991 |

-1 0 0 0  
GROUP  
P1

TITLE  
001-Fe4\_Q  
CELL  
4.7599599300 9.7870255300 1.0000000000 90.000000 90.000000 91.606834  
COORD

|    |                      |                      |                      |
|----|----------------------|----------------------|----------------------|
| 12 | 0.440629761293       | 0.43990767118        | 4.251568562856       |
| 8  | 0.227505226967       | 0.631882819775       | 4.399163912906       |
| 8  | 0.386468656752       | 0.236884975475       | 4.143818804171       |
| 26 | 1.22221082939997E-02 | 0.260515733762       | 2.619993047579       |
| 12 | 0.477818854622       | 0.775647591253       | 2.983460304956       |
| 14 | 0.459844200974       | 0.10826027361        | 3.138918398384       |
| 14 | 5.33936774599997E-02 | 0.588739181022       | 3.068785644203       |
| 8  | 0.794856573567       | 9.88619773420001E-02 | 2.979058567811       |
| 8  | 0.710614524035       | 0.576560421375       | 3.12569106396        |
| 8  | 0.179398624526       | 0.437135870978       | 2.762175124839       |
| 8  | 0.314344043225       | 0.954155608129       | 3.298984278332       |
| 8  | 0.288567897846       | 0.152966219481       | 1.705139641023       |
| 8  | 0.202167992292       | 0.670256624836       | 1.784710239947       |
| 12 | 2.32078959219997E-02 | 0.985343997754       | 1.776715720036       |
| 12 | 0.485500366733       | 0.503864846008       | 1.476087856321       |
| 8  | 0.753316335359       | 0.333340594283       | 1.268698199942       |
| 8  | 0.728430810063       | 0.832117924757       | 1.394099304197       |
| 12 | 7.58884277199967E-03 | 0.727514430006       | 6.15074985249983E-02 |
| 12 | 0.486184342862       | 0.217202015499       | 5.50571077899982E-02 |
| 14 | 0.581184225206       | 0.908546715623       | 0.100640324051998    |
| 14 | 0.916614421266       | 0.406670222286       | 8.0176769899983E-03  |
| 8  | 0.239325660797       | 0.909098946331       | 0.111765250029998    |
| 8  | 0.257240900172       | 0.408644427825       | 2.81425619909982E-02 |
| 8  | 0.767567289263       | 0.558636693838       | 6.37984094339982E-02 |
| 8  | 0.74241397702        | 0.059224945802       | 6.88645476009983E-02 |
| 8  | 0.730405825867       | 0.835931160264       | -1.206018145076      |
| 8  | 0.764692161305       | 0.338011903971       | -1.30738524114       |
| 12 | 0.999998120827       | 0.999998875626       | -1.405169503515      |
| 12 | 0.500014761168       | 0.500006658416       | -1.405199766358      |
| 8  | 0.235296069307       | 0.661982957346       | -1.502864836803      |
| 8  | 0.269588492999       | 0.164066692005       | -1.604323254281      |

|    |                      |                      |                 |
|----|----------------------|----------------------|-----------------|
| 12 | 0.992410458782       | 0.272484671588       | -2.871778921938 |
| 12 | 0.513816601156       | 0.782800465961       | -2.865420467479 |
| 14 | 0.418813091652       | 9.14527979390001E-02 | -2.910979537317 |
| 14 | 8.33879952969998E-02 | 0.59332861946        | -2.81831137775  |
| 8  | 0.760671403335       | 0.09090001119        | -2.922103666672 |
| 8  | 0.742760792211       | 0.591355536316       | -2.838494147219 |
| 8  | 0.232434585979       | 0.441362843031       | -2.874112409913 |
| 8  | 0.257582869623       | 0.940774483223       | -2.879219040436 |
| 8  | 0.271568945443       | 0.167883886224       | -4.204435444864 |
| 8  | 0.246684641502       | 0.666660561132       | -4.078981015593 |
| 12 | 0.976795077705       | 0.014658368171       | -4.587067943163 |
| 12 | 0.514500390041       | 0.496127621913       | -4.286414901878 |
| 8  | 0.797832259994       | 0.329743397972       | -4.595010958751 |
| 8  | 0.711433247371       | 0.847034795805       | -4.515487625142 |
| 12 | 0.98778296622        | 0.739484195329       | -5.430294333064 |
| 12 | 0.522184459006       | 0.224351953431       | -5.793801275155 |
| 14 | 0.540156296191       | 0.891739949992       | -5.949261494824 |
| 14 | 0.946605951039       | 0.411261455262       | -5.879112708894 |
| 8  | 0.20514384355        | 0.901138299048       | -5.789394895847 |
| 8  | 0.289385161137       | 0.423440076299       | -5.936010896808 |
| 8  | 0.82060203682        | 0.562864773502       | -5.572499523815 |
| 8  | 0.68565687423        | 4.58445504280001E-02 | -6.109332112405 |
| 8  | 0.613526305529       | 0.763114996326       | -6.954166069881 |
| 8  | 0.772493930169       | 0.368117868925       | -7.209493655935 |
| 12 | 0.559367175265       | 0.560094845674       | -7.061881708443 |

-1 0 0 0  
GROUP  
P1

TITLE  
001-Fe4\_s  
CELL  
4.7529838400 9.7623222600 1.0000000000 90.000000 90.000000 91.399307  
COORD

|    |                      |                      |                      |
|----|----------------------|----------------------|----------------------|
| 12 | 0.4366239335081      | 0.4421383623433      | 4.217303402553       |
| 8  | 0.2272563936555      | 0.6297036733275      | 4.362667208981       |
| 8  | 0.3612365388308      | 0.2375131584994      | 4.144491701432       |
| 26 | 1.16509695430004E-02 | 0.2627306514419      | 2.74939621498        |
| 12 | 0.4761409419957      | 0.7768084181673      | 3.003335066872       |
| 14 | 0.449056334747001    | 0.1091624058677      | 3.154076156951       |
| 14 | 5.45675014851506E-02 | 0.5884169916592      | 3.017824482443       |
| 8  | 0.7850835857186      | 9.70555971163697E-02 | 3.027879164015       |
| 8  | 0.7126558733238      | 0.5767405484238      | 3.115799009449       |
| 8  | 0.1888369960939      | 0.4384806376496      | 2.671453440689       |
| 8  | 0.3071231433199      | 0.95502458031736     | 3.29907953922        |
| 8  | 0.2820721453587      | 0.1580633593794      | 1.732457447743       |
| 8  | 0.2044371904024      | 0.6740029739039      | 1.774631302142       |
| 12 | 1.21190353469605E-02 | 0.991987023587906    | 1.762936372894       |
| 12 | 0.4912461135993      | 0.5060241736567      | 1.451234546893       |
| 8  | 0.762345458537       | 0.3305352171633      | 1.327378412221       |
| 8  | 0.7226493601322      | 0.8313929712619      | 1.408257360322       |
| 12 | 9.60222603804753E-03 | 0.7284056373153      | 5.62980178162115E-02 |
| 12 | 0.4856155692931      | 0.2181901323378      | 6.08500138928716E-02 |
| 14 | 0.5770671235036      | 0.90724855982683     | 0.113480249643002    |
| 14 | 0.92614253561384     | 0.403261525306       | 5.60844364596114E-02 |
| 8  | 0.2362273423965      | 0.91096325658564     | 0.114171417950802    |
| 8  | 0.2659472630706      | 0.4076190096409      | 1.48720682516715E-02 |
| 8  | 0.7789123932292      | 0.5562323848682      | 8.30128709570016E-02 |

|    |                      |                      |                      |
|----|----------------------|----------------------|----------------------|
| 8  | 0.7361548880048      | 5.79919056564797E-02 | 8.39554464137315E-02 |
| 8  | 0.7267302801116      | 0.83426844649        | -1.186530763823      |
| 8  | 0.7725283793232      | 0.3351509786503      | -1.259798866484      |
| 12 | 0.999402967417111    | 3.65798896245667E-04 | -1.410628474614      |
| 12 | 0.5074503202626      | 0.4981452928089      | -1.396893309465      |
| 8  | 0.2381770247696      | 0.6616395196824      | -1.501629403542      |
| 8  | 0.2749246556676      | 0.1650379399794      | -1.632445739841      |
| 12 | 0.993010050992764    | 0.2714596096976      | -2.855362031339      |
| 12 | 0.5161406246722      | 0.7827635602743      | -2.869403599203      |
| 14 | 0.4206235805128      | 9.14843473738297E-02 | -2.939708744294      |
| 14 | 8.73854910360706E-02 | 0.591574521631       | -2.808575247512      |
| 8  | 0.7621067297935      | 9.08448666800697E-02 | -2.93553848749       |
| 8  | 0.7474817389147      | 0.5895650172621      | -2.823916012174      |
| 8  | 0.2342335141914      | 0.4393082160856      | -2.866952535236      |
| 8  | 0.2605654757597      | 0.94116038382003     | -2.891688694773      |
| 8  | 0.2770277633744      | 0.1681287359115      | -4.237234221383      |
| 8  | 0.2520403908056      | 0.6638370947535      | -4.072328735044      |
| 12 | 0.974271046340341    | 1.63441150315897E-02 | -4.622384592646      |
| 12 | 0.5179475178663      | 0.4936579696911      | -4.26497012187       |
| 8  | 0.8007984423112      | 0.3275480338828      | -4.590714163575      |
| 8  | 0.7029490228289      | 0.8504268450714      | -4.544341511599      |
| 12 | 0.991593912259541    | 0.7408724769769      | -5.409222093272      |
| 12 | 0.5235692352842      | 0.225947393865       | -5.843291593574      |
| 14 | 0.5370019787169      | 0.8915920966124      | -5.994789220688      |
| 14 | 0.950257854844201    | 0.4110015495768      | -5.854122726411      |
| 8  | 0.2017321258275      | 0.90542170821367     | -5.843462432976      |
| 8  | 0.2929162487646      | 0.4232763536093      | -5.939551824626      |
| 8  | 0.8213907827381      | 0.5623349141727      | -5.550525539803      |
| 8  | 0.6821470938211      | 4.57763918362598E-02 | -6.180710996554      |
| 8  | 0.5996131662089      | 0.7587036493114      | -6.962868710673      |
| 8  | 0.7749579452926      | 0.3695220647832      | -7.183798326554      |
| 12 | 0.558253782554       | 0.5571469520639      | -7.018701462636      |

-1 0 0 0

GROUP

P1

TITLE

001-Fe4\_T

CELL

4.7581870500 9.7845614900 1.0000000000 90.000000 90.000000 91.490428

COORD

|    |                      |                   |                |
|----|----------------------|-------------------|----------------|
| 12 | 0.444381837358499    | 0.439117845387    | 4.196622198934 |
| 8  | 0.229891840173699    | 0.6282677815078   | 4.365069342499 |
| 8  | 0.355144735584199    | 0.2363366545291   | 4.130068520519 |
| 26 | 0.997362242189971    | 0.2669569679731   | 2.762042642876 |
| 12 | 0.477248098561799    | 0.7761987443529   | 3.011494721517 |
| 14 | 0.447943193622099    | 0.1091000660689   | 3.144141738875 |
| 14 | 5.41005730791591E-02 | 0.5886270381651   | 3.030576803367 |
| 8  | 0.787814782640999    | 0.1008604052426   | 3.044644762981 |
| 8  | 0.712366471712899    | 0.5789306425183   | 3.107756984752 |
| 8  | 0.184885208564499    | 0.4378935112221   | 2.680731208641 |
| 8  | 0.311054909296499    | 0.95424936756516  | 3.320112015805 |
| 8  | 0.292483080743199    | 0.1515777234752   | 1.703820649011 |
| 8  | 0.204887021239999    | 0.6728782298808   | 1.778352125549 |
| 12 | 1.59606410652091E-02 | 0.991376258425414 | 1.770336574421 |
| 12 | 0.488602948934399    | 0.5080701342649   | 1.446277788028 |
| 8  | 0.756036795665499    | 0.3346996882638   | 1.332648118789 |
| 8  | 0.724466731600099    | 0.8328615474482   | 1.418742677546 |

|    |                      |                      |                      |
|----|----------------------|----------------------|----------------------|
| 12 | 1.01749357059292E-02 | 0.7287472474496      | 5.82485871272888E-02 |
| 12 | 0.485840527312099    | 0.2172843708425      | 5.96250365075289E-02 |
| 14 | 0.578838349763499    | 0.9079377681509      | 0.119120284294399    |
| 14 | 0.923382996149869    | 0.4050627576771      | 0.052852127977529    |
| 8  | 0.238209666126599    | 0.90956437283934     | 0.112021913764799    |
| 8  | 0.262729171013799    | 0.4080024542494      | 2.05735165954589E-02 |
| 8  | 0.776847779801699    | 0.5574917104245      | 0.073889539563499    |
| 8  | 0.739894456877299    | 5.80883616803302E-02 | 7.88347810134488E-02 |
| 8  | 0.727436594760699    | 0.8341813922198      | -1.17998902582       |
| 8  | 0.770690514303899    | 0.3353837995044      | -1.255116489574      |
| 12 | 6.3926005352213E-04  | 0.999922227937312    | -1.408062798833      |
| 12 | 0.505868895821999    | 0.4981291678198      | -1.399368189625      |
| 8  | 0.237702355659799    | 0.6608966196278      | -1.498045206075      |
| 8  | 0.274821980939399    | 0.165084244425       | -1.631171387087      |
| 12 | 0.992667265570199    | 0.2713911816017      | -2.855672499796      |
| 12 | 0.515887056084099    | 0.7828031919818      | -2.863248919449      |
| 14 | 0.420747838847099    | 9.15515293977602E-02 | -2.93575841446       |
| 14 | 8.69234857940392E-02 | 0.5912706370167      | -2.806735773304      |
| 8  | 0.762018944988499    | 9.10737272532602E-02 | -2.933529579493      |
| 8  | 0.747193667041299    | 0.5893752272953      | -2.827069466339      |
| 8  | 0.233495659625799    | 0.4393730752528      | -2.867562051155      |
| 8  | 0.261656561014599    | 0.94126452555461     | -2.885210371224      |
| 8  | 0.276402401140699    | 0.1675955293499      | -4.232964685368      |
| 8  | 0.251577212120599    | 0.6639221018014      | -4.067064575719      |
| 12 | 0.974392381808419    | 1.61382539490002E-02 | -4.6202071632        |
| 12 | 0.517822968624299    | 0.4940799530362      | -4.274430597588      |
| 8  | 0.799811811459499    | 0.3277242207781      | -4.596316924458      |
| 8  | 0.702539740288999    | 0.8502866370236      | -4.545280414319      |
| 12 | 0.991262594355909    | 0.7412585330419      | -5.396866320684      |
| 12 | 0.522596927684499    | 0.2251138571738      | -5.836482675364      |
| 14 | 0.537152378010799    | 0.8921868320587      | -5.995116393628      |
| 14 | 0.949880839540139    | 0.4106413992693      | -5.861790556358      |
| 8  | 0.202241896298799    | 0.90515315912396     | -5.841239734127      |
| 8  | 0.292409112803399    | 0.4205595388917      | -5.934891975254      |
| 8  | 0.823257162694499    | 0.5622220600338      | -5.563990823944      |
| 8  | 0.682373692825899    | 4.60023089274302E-02 | -6.171214411678      |
| 8  | 0.603114584913699    | 0.7606792128157      | -6.973782932465      |
| 8  | 0.775038078797199    | 0.3675038026615      | -7.192669358495      |
| 12 | 0.559827141352099    | 0.5570504035709      | -7.056919778557      |

-1 0 0 0

GROUP

P1

TITLE

010-Fe1\_Q

CELL

4.7482332800 12.0857378600 1.0000000000 90.000000 90.000000 89.999270

COORD

|    |                  |                 |                |
|----|------------------|-----------------|----------------|
| 12 | 0.93770665130983 | 0.1250543103136 | 4.008087852233 |
| 8  | 0.7729906868247  | 0.4852771108061 | 3.916485942926 |
| 8  | 0.7729770252697  | 0.2646092271066 | 3.916632563228 |
| 14 | 0.91318501320094 | 0.3749355063873 | 3.235339961555 |
| 8  | 0.2473442164054  | 0.3749455773129 | 3.020257662081 |
| 8  | 0.2405117321517  | 0.1249287195424 | 2.769694611726 |
| 12 | 0.4912921809204  | 0.4951440923571 | 2.26918476451  |
| 12 | 0.4912112000293  | 0.254748299931  | 2.269661288062 |
| 8  | 0.7593713163178  | 0.3749166261712 | 1.719448072678 |
| 8  | 0.7408321110311  | 0.1249458003319 | 1.40152877097  |



|    |                      |                      |                    |
|----|----------------------|----------------------|--------------------|
| 14 | 8.09955308346898E-02 | 0.1248644393506      | 1.258387444731     |
| 8  | 0.2300928694109      | 0.2334792421111      | 0.593752253009201  |
| 8  | 0.2311444974914      | 1.62379441351302E-02 | 0.5966186814539    |
| 12 | 1.46830127177498E-02 | 0.3749300560177      | 0.1119254572476    |
| 12 | 0.5173795254742      | 0.1250943440922      | -0.5007368247291   |
| 8  | 0.728646818456       | 0.2665973208197      | -0.993396536272299 |
| 8  | 0.7286330593012      | 0.4832767318427      | -0.9928938042842   |
| 14 | 0.5768820754678      | 0.3749469994583      | -1.656667611378    |
| 8  | 0.2365687245411      | 0.3749363336338      | -1.767173581541    |
| 8  | 0.262782482548       | 0.1251996675314      | -2.106549129529    |
| 12 | 0.995297879466315    | 4.39921903016219E-03 | -2.649228040718    |
| 12 | 0.993983533747036    | 0.2457077219582      | -2.652795355348    |
| 8  | 0.7372866160401      | 0.3749832468833      | -3.172245422982    |
| 8  | 0.7524250454515      | 0.1248325834704      | -3.399594732837    |
| 14 | 0.4187142204637      | 0.1241185198564      | -3.614398055483    |
| 8  | 0.277330544354       | 1.42687036139102E-02 | -4.295308882962    |
| 8  | 0.279953597834       | 0.2348760769994      | -4.300581330428    |
| 26 | 0.4357838911199      | 0.3749467880373      | -4.462845190221    |
| 12 | 0.93781366488728     | 0.6248137221308      | 4.008557098017     |
| 8  | 0.7735624011937      | 0.98533739165488     | 3.92223823027      |
| 8  | 0.7735832895437      | 0.7645206048842      | 3.922301290503     |
| 14 | 0.91369508356339     | 0.8749310892735      | 3.242316611393     |
| 8  | 0.2478287297174      | 0.8749307600346      | 3.024156411751     |
| 8  | 0.240497064775       | 0.6249349627835      | 2.769609755448     |
| 12 | 0.4918428178733      | 0.995205023790126    | 2.273569484269     |
| 12 | 0.4918436287437      | 0.7546611627558      | 2.273505195247     |
| 8  | 0.7599864219841      | 0.8749353964575      | 1.726369709562     |
| 8  | 0.7407838944516      | 0.624933090852       | 1.401625979241     |
| 14 | 8.09547571767699E-02 | 0.625012311227       | 1.258431883812     |
| 8  | 0.2311096118161      | 0.7336364598197      | 0.596655011208101  |
| 8  | 0.2300455620301      | 0.5164005067009      | 0.5936057932344    |
| 12 | 1.69544097319498E-02 | 0.8749436120805      | 0.1255834304833    |
| 12 | 0.5174149237989      | 0.6248143898906      | -0.5010229963593   |
| 8  | 0.7321072341731      | 0.7662834858938      | -0.977094802888099 |
| 8  | 0.7321043838167      | 0.98364619571963     | -0.9772592964311   |
| 14 | 0.5826234152788      | 0.8749616552661      | -1.641142489301    |
| 8  | 0.2424894197739      | 0.8749664300271      | -1.780468165618    |
| 8  | 0.2627918760382      | 0.6247297969919      | -2.106618233799    |
| 12 | 0.994177605038695    | 0.5041496339676      | -2.651404701222    |
| 12 | 0.995291384815263    | 0.7454954458787      | -2.64888510153     |
| 8  | 0.7428946896625      | 0.8749496357781      | -3.150814879351    |
| 8  | 0.7524555048719      | 0.6250442901905      | -3.39879750338     |
| 14 | 0.4187675426541      | 0.6257793225004      | -3.614372093618    |
| 8  | 0.2800023137226      | 0.5150181181173      | -4.300389098855    |
| 8  | 0.2773718404107      | 0.7356263577796      | -4.295366415492    |
| 12 | 0.4432396169924      | 0.8749476050648      | -4.407577972033    |

-1 0 0 0

GROUP

P1

TITLE

010-Fe1\_S

CELL

4.7475044200 12.0719512500 1.0000000000 90.000000 90.000000 89.956311

COORD

|    |                  |                 |                |
|----|------------------|-----------------|----------------|
| 12 | 0.93815731844133 | 0.1250500926054 | 4.01135451978  |
| 8  | 0.7722208170447  | 0.48534720398   | 3.918416320521 |
| 8  | 0.7723515621911  | 0.2645381976011 | 3.918412652813 |

|    |                      |                      |                  |
|----|----------------------|----------------------|------------------|
| 14 | 0.91267996645862     | 0.374906360305       | 3.237149108779   |
| 8  | 0.2468898456597      | 0.3749304868446      | 3.024286621601   |
| 8  | 0.2399601170264      | 0.1249714966515      | 2.768373673151   |
| 12 | 0.4907328149414      | 0.4951127893168      | 2.270741802015   |
| 12 | 0.4907628894699      | 0.2547446818794      | 2.269783099993   |
| 8  | 0.758945841714       | 0.3749172334118      | 1.721063085182   |
| 8  | 0.7402922598386      | 0.1250467930825      | 1.398656174082   |
| 14 | 8.04940548880697E-02 | 0.1249367566629      | 1.257007488334   |
| 8  | 0.2294833541344      | 0.2336561343784      | 0.5931339004489  |
| 8  | 0.230934910804       | 1.61870570513503E-02 | 0.595428554258   |
| 12 | 1.30304037085297E-02 | 0.3750091970774      | 0.1093066079026  |
| 12 | 0.5170419136316      | 0.1253739328204      | -0.501956907081  |
| 8  | 0.7275872351781      | 0.2669062000687      | -1.000384699841  |
| 8  | 0.7277573519863      | 0.4833343714773      | -0.993353359141  |
| 14 | 0.5747795012204      | 0.3753485684493      | -1.662611779153  |
| 8  | 0.2345466603577      | 0.3749969761638      | -1.766070681138  |
| 8  | 0.2625148965411      | 0.1252736055305      | -2.106305616439  |
| 12 | 0.99505220795891     | 4.66640912334427E-03 | -2.65194493441   |
| 12 | 0.993835782250861    | 0.2464104554989      | -2.65651184161   |
| 8  | 0.734002949681       | 0.3756893273182      | -3.179057014233  |
| 8  | 0.7526726847394      | 0.125234857155       | -3.402896114614  |
| 14 | 0.4187698876933      | 0.1245384594355      | -3.612589229122  |
| 8  | 0.2776260970975      | 1.46874612475403E-02 | -4.297844698675  |
| 8  | 0.2808109053709      | 0.2361163194314      | -4.290198575942  |
| 26 | 0.4431692387605      | 0.374434130511       | -4.486921801029  |
| 12 | 0.93787097189096     | 0.6247777562454      | 4.011503462525   |
| 8  | 0.7729563358709      | 0.98549154595217     | 3.922556837223   |
| 8  | 0.7732979957937      | 0.7645695541544      | 3.9239797991     |
| 14 | 0.91345200420129     | 0.8749929304205      | 3.243050129606   |
| 8  | 0.2476287886615      | 0.8750484571916      | 3.026262213747   |
| 8  | 0.2401073454437      | 0.6250214263736      | 2.770560570814   |
| 12 | 0.4916175665274      | 0.995302977057122    | 2.272841875674   |
| 12 | 0.4916590399646      | 0.7546953428685      | 2.275278080588   |
| 8  | 0.7598974657588      | 0.874945323002       | 1.726688299566   |
| 8  | 0.7404084745034      | 0.6250448701779      | 1.40225177277    |
| 14 | 8.06018206646897E-02 | 0.6250823927444      | 1.259371762012   |
| 8  | 0.2310027250808      | 0.7337565996051      | 0.5974518696506  |
| 8  | 0.229550460383       | 0.516296906842       | 0.5951728237681  |
| 12 | 1.66504293700297E-02 | 0.8750109974166      | 0.1245089678848  |
| 12 | 0.5175471764009      | 0.624901867666       | -0.4964303326865 |
| 8  | 0.7325732572664      | 0.7662491601659      | -0.9779765110556 |
| 8  | 0.7321165285626      | 0.98377221489496     | -0.9800845653129 |
| 14 | 0.5830080316425      | 0.8749604202544      | -1.644097477179  |
| 8  | 0.2428449387516      | 0.8748992428273      | -1.787076152438  |
| 8  | 0.2639558604104      | 0.6246634535073      | -2.102742230678  |
| 12 | 0.995111153158419    | 0.5036792147433      | -2.649862645348  |
| 12 | 0.996139680515969    | 0.7452450164723      | -2.650121619645  |
| 8  | 0.7431495055263      | 0.8748604348611      | -3.154164491086  |
| 8  | 0.7546669255488      | 0.6247946376363      | -3.399187941248  |
| 14 | 0.4209079599758      | 0.6249139100842      | -3.60707406896   |
| 8  | 0.2841914787679      | 0.512562928483       | -4.274678997022  |
| 8  | 0.278613038515       | 0.7343242491047      | -4.29926097666   |
| 12 | 0.4416087187735      | 0.8745802807862      | -4.403283849782  |

-1 0 0 0

GROUP

P1

TITLE

010-Fe1\_T

CELL

4.7451489600 12.0932560200 1.0000000000 90.000000 90.000000 89.986586

COORD

|    |                      |                      |                  |
|----|----------------------|----------------------|------------------|
| 12 | 0.93695204947568     | 0.1251436745131      | 4.006902966001   |
| 8  | 0.772161105508       | 0.4852424049452      | 3.914740469135   |
| 8  | 0.7722160891571      | 0.2646588195132      | 3.914942758847   |
| 14 | 0.91244948271413     | 0.3749368851094      | 3.233925796693   |
| 8  | 0.2467982470813      | 0.374950007114       | 3.020710533012   |
| 8  | 0.2400427038826      | 0.1250804376784      | 2.768977567021   |
| 12 | 0.490395766798       | 0.4949987694039      | 2.267963464038   |
| 12 | 0.4903924778597      | 0.2548918637919      | 2.268013882976   |
| 8  | 0.7586596179076      | 0.3749256978885      | 1.717439762394   |
| 8  | 0.7401808439573      | 0.125124287369       | 1.399694728404   |
| 14 | 8.05784717755299E-02 | 0.1250419116432      | 1.25731153337    |
| 8  | 0.2291095459925      | 0.2336558005667      | 0.5916427096154  |
| 8  | 0.2309447371169      | 1.64266892090902E-02 | 0.5973368357758  |
| 12 | 1.23090290751999E-02 | 0.3749604217763      | 0.1040453965566  |
| 12 | 0.5176987643811      | 0.1253010341171      | -0.4996509632934 |
| 8  | 0.726868179086       | 0.2669259384303      | -1.005059185256  |
| 8  | 0.7269106430689      | 0.4829826879179      | -1.002868792727  |
| 14 | 0.5740332038761      | 0.3750212372273      | -1.671976204834  |
| 8  | 0.2330917505754      | 0.3749293997393      | -1.776419152021  |
| 8  | 0.2639549187949      | 0.1252686673122      | -2.104919350705  |
| 12 | 0.997441752650544    | 4.07184667085116E-03 | -2.64126459276   |
| 12 | 0.99309008572701     | 0.2458200435161      | -2.66252981518   |
| 8  | 0.7306490263367      | 0.3751537932234      | -3.192021123362  |
| 8  | 0.7553155766463      | 0.1239947910334      | -3.396793632477  |
| 14 | 0.4215210554568      | 0.1233310209786      | -3.607341837099  |
| 8  | 0.2793379759733      | 1.38497906745402E-02 | -4.289609869478  |
| 8  | 0.2855824538003      | 0.2342625388607      | -4.297852867931  |
| 26 | 0.4260181252462      | 0.3746154938602      | -4.455731308805  |
| 12 | 0.93692332471473     | 0.6247265568696      | 4.006849188149   |
| 8  | 0.773165461962       | 0.98539262246107     | 3.922317071138   |
| 8  | 0.7732645538927      | 0.764538170221       | 3.922459671465   |
| 14 | 0.91320109830701     | 0.8749588681443      | 3.243254160729   |
| 8  | 0.247495888504       | 0.8749761631959      | 3.023305399835   |
| 8  | 0.2401022502655      | 0.6248501294841      | 2.769401810274   |
| 12 | 0.4913681832331      | 0.995286768483603    | 2.273141349862   |
| 12 | 0.4914108815993      | 0.7546424806551      | 2.273609596933   |
| 8  | 0.7595011114868      | 0.8749600360283      | 1.727341987797   |
| 8  | 0.740241595808       | 0.6248284505341      | 1.400368645041   |
| 14 | 8.06440201482199E-02 | 0.6249027100656      | 1.25774844197    |
| 8  | 0.2309847199091      | 0.7335036324893      | 0.5979424494466  |
| 8  | 0.2291333779274      | 0.5162624435649      | 0.5920269594015  |
| 12 | 1.74201226441699E-02 | 0.8749772585333      | 0.1307829867057  |
| 12 | 0.5179144164023      | 0.6247104532155      | -0.4984519261865 |
| 8  | 0.7328851204847      | 0.7663301577639      | -0.9718263687428 |
| 8  | 0.7327418315978      | 0.98368147334602     | -0.9729673380094 |
| 14 | 0.5837374049232      | 0.874977263621       | -1.636471472746  |
| 8  | 0.2433903770579      | 0.8749769694802      | -1.773116656632  |
| 8  | 0.2643334167465      | 0.6247183538044      | -2.103026406543  |
| 12 | 0.993570253519346    | 0.5041338550311      | -2.65961968659   |
| 12 | 0.997707073263188    | 0.7458207833354      | -2.640210350118  |
| 8  | 0.7443725813174      | 0.8749411831098      | -3.14499152562   |
| 8  | 0.7558023267316      | 0.6259544374295      | -3.394237134434  |
| 14 | 0.4220276677103      | 0.6263785461689      | -3.605329038839  |
| 8  | 0.2864410300517      | 0.5152296631713      | -4.290601914402  |

```

8    0.2795823593242    0.7357742664038    -4.289629403062
12   0.4461730172628    0.8748100159179    -4.409777242471
-1  0  0  0
GROUP
P1

TITLE
110-Fe2_Q
CELL
5.7352637500 11.3433825300 1.0000000000 90.000000 90.000000 91.731749
COORD
12   0.581446889422301    8.69651611566301E-02    2.307520079403
26   0.361582649683301    0.5412704726735    2.257604867238
8    2.84957994019206E-02    0.4395446638135    2.126867334312
8    0.543513634588901    0.3997128709682    2.292168253466
8    0.7712877511915    0.95723192287533    2.163586743968
8    0.280757418764601    3.07919039933005E-03    1.819653498088
12   0.251185838423601    0.3304749282558    1.21981911988
12   0.250018651790101    0.8354012877197    1.189541941913
8    0.229040287100601    0.6585424053014    1.136924168519
8    0.689400035853401    0.5929684025565    1.292556045893
14   0.772471550429    0.4562004936234    1.407861090912
8    2.82007844072206E-02    0.1902177504327    0.898482865396497
8    0.472107276956101    0.1902585835452    0.901900897942997
14   0.756640681315201    0.91833756407699    0.633678903560097
14   0.237711437537301    9.98460647114101E-02    0.612864050420497
8    0.533110049517001    0.8347783625789    0.148705375309997
8    0.97054107952823    0.8367064703016    0.127311846670697
14   0.245467255913901    0.5924377322633    -0.305202066901403
8    0.254096183846201    0.4451724765222    -0.287804820537903
8    0.760084375486801    0.3977453007952    -0.131639630664503
12   0.7566938426219    0.2081762661279    -0.322395373471603
12   0.744466876906    0.6935289360316    -0.382217282354303
8    0.753160422263301    2.33105320523701E-02    -0.529885775795603
8    0.248808102607001    3.96224835456101E-02    -0.851351281839103
8    0.467609044527301    0.619795271483    -1.296776322982
8    1.51672154436805E-02    0.6134768180903    -1.234961550577
12   6.29986454917757E-04    0.93357318414494    -1.602459267464
12   0.499870163687001    0.93356148285207    -1.602273717416
12   0.997031833665322    0.4332157369958    -1.643762367202
12   0.497203977100801    0.4319926024501    -1.650203430841
8    0.98499725840985    0.2524556607834    -1.99746373118
8    0.532505959221601    0.2442843310159    -1.931929861105
8    0.7522929220376    0.8269071940045    -2.355388650584
8    0.247553652565701    0.8430565781812    -2.68002666076
12   0.255481674854301    0.1741264037246    -2.880000655228
12   0.243648636485901    0.6584764303173    -2.890987246912
8    0.234737164324601    0.4700793583767    -3.130794492106
8    0.739303698870701    0.4162950282015    -3.034237585747
14   0.754648548891401    0.2689948945111    -2.93101428834
8    2.98037126789005E-02    2.93072750908101E-02    -3.340207507378
8    0.467020431045801    3.13046924790601E-02    -3.364661479475
14   0.763015771634801    0.7677664413049    -3.825654968655
14   0.243679726107101    0.9477012526554    -3.844459356296
8    0.529872352138901    0.6768245231191    -4.100824724556
8    0.9740941390483    0.6785011901059    -4.128444198508
14   0.229104776000601    0.4123322218762    -4.679131375473
8    0.311620790393701    0.2755236336015    -4.543833002499

```

```

8 0.77108958007 0.2053814342186 -4.376430427303
12 0.750254548000201 3.01400881309801E-02 -4.403075222697
12 0.752441905266101 0.5396756274568 -4.484699013898
8 0.717620028473701 0.8634846503382 -5.037906453575
8 0.228249212554201 0.90896749083535 -5.376215415686
8 0.458911226940101 0.4707778916408 -5.524611306226
8 0.971457576725281 0.4284446183336 -5.397570143496
12 0.415689304203 0.7780564115686 -5.507527807701
12 0.643104306622101 0.3287106591765 -5.438183822586
-1 0 0 0
GROUP
P1

TITLE
110-Fe2_s
CELL
5.7833565700 11.2845803000 1.0000000000 90.000000 90.000000 91.688910
COORD
12 0.572062230562201 8.49404902311603E-02 2.330555144992
26 0.416800078754701 0.5607044510939 2.227526151337
8 1.08792081939206E-02 0.4341774315156 2.139388724551
8 0.532037102391401 0.411741997654 2.207066186542
8 0.767565494647601 0.95776803205741 2.173216448966
8 0.276342336724701 3.25495720661433E-03 1.804242901788
12 0.242652059001901 0.3373028897839 1.281404362401
12 0.250160683359001 0.834896702383 1.168101154409
8 0.236640690798201 0.6540084678676 1.14806824777
8 0.700210222359101 0.5989968016646 1.294371594406
14 0.774113666301101 0.4575899322107 1.362776987174
8 2.93248526296306E-02 0.1926868519386 0.879041567792497
8 0.471132147674501 0.1926727858691 0.939941375241198
14 0.756766396497501 0.91860478217396 0.643960138631398
14 0.237968868592701 0.1029576720729 0.610342915228397
8 0.534171287943301 0.835145122069 0.152815421549698
8 0.969759923353311 0.8365258326552 0.140126050410097
14 0.245962509708201 0.5890467717652 -0.304445228062602
8 0.249622354847701 0.4418386689515 -0.312799777837703
8 0.755225599998301 0.4006030811389 -0.175498799823402
12 0.755213125349901 0.2089381252685 -0.302504448034302
12 0.744241273933901 0.6958160935271 -0.452348894644103
8 0.7537830023915 2.37291074094903E-02 -0.525760452233602
8 0.250110842954601 4.16909066934103E-02 -0.855737701582902
8 0.466780523768601 0.6174410966857 -1.293203945708
8 1.76945215383506E-02 0.6138451137554 -1.221864255174
12 1.80793497194854E-03 0.93418490011507 -1.58970411719
12 0.499924415812201 0.93456549298234 -1.591863516955
12 0.994525038574143 0.4329175429379 -1.663334370357
12 0.494376740052401 0.4297542507996 -1.659049141088
8 0.982671369033631 0.2512380585427 -2.005387289902
8 0.533095333389401 0.2423071753104 -1.931720135785
8 0.752292509494301 0.8255219358953 -2.328783774011
8 0.247668883562101 0.8416615285607 -2.652583616141
12 0.254794877922101 0.1730182075017 -2.864020298087
12 0.243836830044401 0.6574280006478 -2.888195110087
8 0.232305980241501 0.4691546646409 -3.137978387285
8 0.736229930743101 0.4150578843322 -3.045720076565
14 0.7535504317954 0.267245083629 -2.929601384728
8 3.11740458955005E-02 2.73886928617703E-02 -3.345220324975

```

8 0.466107911900501 2.93550332495603E-02 -3.367227714488  
14 0.763274821043201 0.766181339969 -3.803227976654  
14 0.244184243285901 0.94509485173166 -3.837310104305  
8 0.530852661092701 0.6759510890543 -4.087768072495  
8 0.97168383510513 0.6761736881781 -4.094056360746  
14 0.226567256957001 0.411282394938 -4.686132052361  
8 0.309813356020901 0.2739085016739 -4.543623737942  
8 0.768498830781 0.2036400869024 -4.378018415019  
12 0.750350153734001 2.87759941789903E-02 -4.383215777643  
12 0.751884052289401 0.5381866055232 -4.489295840431  
8 0.721651204055101 0.8622377756956 -5.023187691069  
8 0.230946097861501 0.90460379887853 -5.364655063069  
8 0.455880133350601 0.4701086106928 -5.527350458295  
8 0.970404111942461 0.4271446883805 -5.400764429343  
12 0.425108286320001 0.7768372077581 -5.521204067764  
12 0.637317718452301 0.3268721481892 -5.427747768429

-1 0 0 0

GROUP

P1

TITLE

110-Fe2\_T

CELL

5.7225157300 11.3391454700 1.0000000000 90.000000 90.000000 91.811724

COORD

12 0.5782174570789 8.57947883918797E-02 2.336488699837  
26 0.3781108339865 0.5402320852704 2.104349834752  
8 4.13405939788698E-02 0.4466448081794 2.094061424233  
8 0.550425697395 0.3996239052899 2.290296417343  
8 0.7707422344622 0.9574284196926 2.172104070292  
8 0.2783905582786 2.65018904545968E-03 1.821295796235  
12 0.2568881843176 0.3311251606031 1.233720056689  
12 0.2490644857719 0.8337730531795 1.208885546217  
8 0.2241971791831 0.6576882652342 1.130546357727  
8 0.6764829105507 0.5922740065013 1.338319353678  
14 0.7794336181976 0.4567778361113 1.420363840278  
8 3.02975608268197E-02 0.1917303853375 0.907067836859897  
8 0.4744024577096 0.1897026010027 0.919789285869097  
14 0.756230988312 0.91870663732004 0.642702456608597  
14 0.2381330509891 0.100196957609 0.619362435424997  
8 0.5318865189342 0.8351669630683 0.154840345663498  
8 0.96965018517557 0.8364924669311 0.135036894584997  
14 0.242528692475 0.5909866561333 -0.304766262394102  
8 0.2531870134736 0.4432669185325 -0.316547871600302  
8 0.7630636939946 0.3997550174041 -0.123130714445603  
12 0.7578505245893 0.2084544676766 -0.312127210735802  
12 0.7416273350923 0.6949548152881 -0.395910112130902  
8 0.7538638197717 2.34972617483897E-02 -0.523576110346302  
8 0.24892792962 4.05211784218397E-02 -0.848712689358702  
8 0.4655696464286 0.6196349881357 -1.294151008771  
8 1.15255855056997E-02 0.6126078488643 -1.232968417028  
12 6.11073547111069E-04 0.9335808739024 -1.594098704018  
12 0.4997271315895 0.93400328367751 -1.59592472461  
12 0.996809627472317 0.4325091587178 -1.656406827488  
12 0.4973166255921 0.4323740138296 -1.661116844542  
8 0.984001787544099 0.2520556919896 -1.995747068599  
8 0.5319110195349 0.2445499509063 -1.923437856835  
8 0.7518730678333 0.82599916102 -2.346901849486

|    |                      |                      |                 |
|----|----------------------|----------------------|-----------------|
| 8  | 0.2473902780574      | 0.8429689753828      | -2.676165166648 |
| 12 | 0.2547084744202      | 0.1739808374211      | -2.870864491609 |
| 12 | 0.2426765957754      | 0.6583442830043      | -2.885806688609 |
| 8  | 0.2340889193721      | 0.4705418061807      | -3.141297877375 |
| 8  | 0.7390059954106      | 0.4157915693569      | -3.0440060919   |
| 14 | 0.7535474866663      | 0.2683729824541      | -2.931233859662 |
| 8  | 2.86407075549597E-02 | 2.90709338655697E-02 | -3.332260642713 |
| 8  | 0.4669436107827      | 3.15231288602297E-02 | -3.358443002546 |
| 14 | 0.7622006397605      | 0.7675548214923      | -3.822652535703 |
| 14 | 0.2430998529569      | 0.94782352738076     | -3.838915096306 |
| 8  | 0.5292484534867      | 0.6760600320383      | -4.095542450002 |
| 8  | 0.97450769851486     | 0.678884885771       | -4.135440671383 |
| 14 | 0.2288777211147      | 0.4121968200392      | -4.685430461066 |
| 8  | 0.3112973580128      | 0.2754422256912      | -4.539655870595 |
| 8  | 0.7704601944297      | 0.2049477103908      | -4.377526582803 |
| 12 | 0.7497324448899      | 2.99648397291997E-02 | -4.406124313297 |
| 12 | 0.7525125596459      | 0.5395827679541      | -4.49372196826  |
| 8  | 0.7151360377076      | 0.8632689703172      | -5.031132538187 |
| 8  | 0.226685385449       | 0.90929533752984     | -5.370904698693 |
| 8  | 0.4589556633768      | 0.4704994461033      | -5.534093594035 |
| 8  | 0.97106454799354     | 0.4282135248945      | -5.407744740669 |
| 12 | 0.4114841276833      | 0.7771501362729      | -5.493978463504 |
| 12 | 0.643446157725       | 0.3284820222467      | -5.439929777463 |

-1 0 0 0

GROUP

P1

TITLE

110-Fe8\_Q

CELL

5.7356356400 11.3652095600 1.0000000000 90.000000 90.000000 91.718696

COORD

|    |                      |                      |                    |
|----|----------------------|----------------------|--------------------|
| 12 | 0.581147620572201    | 8.69464425209597E-02 | 2.294323634986     |
| 12 | 0.356914504335301    | 0.5395550927126      | 2.188795136312     |
| 8  | 2.80176732365207E-02 | 0.43906404776        | 2.130608388793     |
| 8  | 0.540161930267201    | 0.3971580336027      | 2.263381797849     |
| 8  | 0.772093952358901    | 0.95800507960819     | 2.167831221809     |
| 8  | 0.279867051622801    | 2.86766666171173E-03 | 1.803694415495     |
| 12 | 0.248640788460601    | 0.3278448167944      | 1.232367583002     |
| 26 | 0.248872667848801    | 0.8351814161476      | 1.261674509002     |
| 8  | 0.2277872192252301   | 0.6604113735177      | 1.101201224646     |
| 8  | 0.687732936956701    | 0.5917369122316      | 1.292172465089     |
| 14 | 0.770087724232601    | 0.4551986909487      | 1.417784066118     |
| 8  | 2.72178235875507E-02 | 0.1889231881843      | 0.891105559408598  |
| 8  | 0.470662736278101    | 0.1889431599007      | 0.884770595681698  |
| 14 | 0.756321103363101    | 0.91802293855981     | 0.642688670067098  |
| 14 | 0.236917812164501    | 9.92623654929598E-02 | 0.589044161102998  |
| 8  | 0.533285922179801    | 0.8343504695721      | 0.165403478203297  |
| 8  | 0.968590042991031    | 0.8361055437833      | 0.132599324372898  |
| 14 | 0.244231378860701    | 0.596415463246       | -0.339203348859802 |
| 8  | 0.258880762533401    | 0.4496148267984      | -0.237167119662202 |
| 8  | 0.763028366242401    | 0.3973977216735      | -0.132582865245102 |
| 12 | 0.755964342671101    | 0.207746901766       | -0.325475973335802 |
| 12 | 0.743885411437001    | 0.6923413645925      | -0.361988577951402 |
| 8  | 0.752398147922901    | 2.23827878721397E-02 | -0.524358174500302 |
| 8  | 0.248081571772501    | 3.90716830872297E-02 | -0.868769710684402 |
| 8  | 0.467520060341601    | 0.6221005353223      | -1.323246601831    |
| 8  | 1.30907720872506E-02 | 0.6138274625746      | -1.263779750943    |

|    |                      |                      |                 |
|----|----------------------|----------------------|-----------------|
| 12 | 0.999627372617358    | 0.93248147778582     | -1.60370415291  |
| 12 | 0.499331618156101    | 0.93213123005508     | -1.600522474429 |
| 12 | 0.999706410597807    | 0.4330914705862      | -1.625566264835 |
| 12 | 0.500247850023801    | 0.433105491626       | -1.625322064645 |
| 8  | 0.986450369958491    | 0.25265226656        | -1.987288519105 |
| 8  | 0.533317819696001    | 0.2445526236375      | -1.923702732185 |
| 8  | 0.751529274952401    | 0.8270006618822      | -2.362187665452 |
| 8  | 0.246793171130301    | 0.8428138678242      | -2.685467767257 |
| 12 | 0.256511298141201    | 0.1736262671842      | -2.870796287495 |
| 12 | 0.243968138231201    | 0.6586272994816      | -2.920975076291 |
| 8  | 0.236710237550101    | 0.4696291592873      | -3.114532106452 |
| 8  | 0.740813852485201    | 0.4165868417404      | -3.020303954    |
| 14 | 0.755808196862201    | 0.2696675639407      | -2.919943620613 |
| 8  | 3.00317411031607E-02 | 2.93007598616898E-02 | -3.337355584332 |
| 8  | 0.467202357008901    | 3.10027663832997E-02 | -3.359334988398 |
| 14 | 0.763088813484301    | 0.7681648259392      | -3.833359275615 |
| 14 | 0.243706856759001    | 0.94788550829059     | -3.843567273369 |
| 8  | 0.529516894380501    | 0.6779458967753      | -4.125453953901 |
| 8  | 0.973159226923911    | 0.6785826315531      | -4.137864668468 |
| 14 | 0.230001390659801    | 0.4117558042427      | -4.663890805449 |
| 8  | 0.312106694479301    | 0.2751726659825      | -4.532152520985 |
| 8  | 0.771853342736601    | 0.2057435887655      | -4.36305534733  |
| 12 | 0.750475603435701    | 3.08030847969498E-02 | -4.394554747503 |
| 12 | 0.752052120962501    | 0.539712303096       | -4.476483338851 |
| 8  | 0.719853903651601    | 0.8645737240147      | -5.041376879855 |
| 8  | 0.229279810170401    | 0.90996277440449     | -5.378571199557 |
| 8  | 0.459596298711101    | 0.4700920259254      | -5.510224790523 |
| 8  | 0.972332890988131    | 0.4282913520402      | -5.380461669438 |
| 12 | 0.419140380835201    | 0.7805556572312      | -5.527646019024 |
| 12 | 0.644300766730201    | 0.3287338235665      | -5.426373563782 |

-1 0 0 0  
GROUP  
P1

TITLE  
110-Fe8\_s  
CELL  
5.7021683500 11.3724381300 1.0000000000 90.000000 90.000000 91.786953  
COORD

|    |                      |                      |                    |
|----|----------------------|----------------------|--------------------|
| 12 | 0.5709222569161      | 8.38011290274899E-02 | 2.302154043338     |
| 12 | 0.3527066979616      | 0.5399813313647      | 2.176698678236     |
| 8  | 2.78844563634698E-02 | 0.4393031148383      | 2.134897685077     |
| 8  | 0.53818367192        | 0.3979463826716      | 2.265470301177     |
| 8  | 0.7686444193077      | 0.95697377340442     | 2.208057315112     |
| 8  | 0.2764898710004      | 0.998887032842676    | 1.709216968498     |
| 12 | 0.2487623832462      | 0.3277362305356      | 1.231514626162     |
| 26 | 0.2520002986218      | 0.8320477599649      | 1.230732722822     |
| 8  | 0.2261528387473      | 0.6617236171933      | 1.085828938077     |
| 8  | 0.6876116359916      | 0.59235856166        | 1.296746372817     |
| 14 | 0.7689821577967      | 0.455736107985       | 1.420617393365     |
| 8  | 2.74803112268299E-02 | 0.1891778326934      | 0.875289875832402  |
| 8  | 0.470934350173       | 0.1884940017822      | 0.893191665231502  |
| 14 | 0.7580979431188      | 0.91828359514683     | 0.678171244608002  |
| 14 | 0.2364434607292      | 9.91877325149798E-02 | 0.549844362772402  |
| 8  | 0.5309150350804      | 0.8340559755957      | 0.200438211228902  |
| 8  | 0.97542746249183     | 0.8367993772851      | 0.176323337211602  |
| 14 | 0.2443995862644      | 0.5974964418585      | -0.346039047177298 |
| 8  | 0.2587109303102      | 0.4507803727793      | -0.233099263523698 |



|    |                      |                      |                    |
|----|----------------------|----------------------|--------------------|
| 8  | 0.7621256993809      | 0.3980850509671      | -0.130802778928298 |
| 12 | 0.755127158007       | 0.2084994342888      | -0.321338382611798 |
| 12 | 0.7451421085815      | 0.6920285256905      | -0.354137225422998 |
| 8  | 0.7540279455102      | 2.10194497558199E-02 | -0.503516669884598 |
| 8  | 0.2498318124411      | 4.25288365678298E-02 | -0.925146860955498 |
| 8  | 0.4690955517353      | 0.6226838797159      | -1.328297117766    |
| 8  | 1.26573097420199E-02 | 0.6143675943569      | -1.27871892822     |
| 12 | 1.02730500126781E-03 | 0.93253528276746     | -1.59862361386     |
| 12 | 0.5008492056856      | 0.93245668287452     | -1.598785435946    |
| 12 | 0.999723472757608    | 0.433266497607       | -1.623485475849    |
| 12 | 0.5002157155774      | 0.4335195888913      | -1.626786126772    |
| 8  | 0.9870618239669      | 0.2530782889498      | -1.982427315338    |
| 8  | 0.5332233678614      | 0.2449367945838      | -1.918639946174    |
| 8  | 0.7528657212665      | 0.825691572673       | -2.339187663416    |
| 8  | 0.2481594699268      | 0.8430593408101      | -2.685877234713    |
| 12 | 0.2563120132561      | 0.1726243705858      | -2.855178595585    |
| 12 | 0.2443518835117      | 0.6584854207238      | -2.916039105419    |
| 8  | 0.237101234721       | 0.4698289946115      | -3.114439321641    |
| 8  | 0.7412158067833      | 0.4166594058346      | -3.024371673876    |
| 14 | 0.7560482495336      | 0.2698463900274      | -2.921749603255    |
| 8  | 2.86713791899899E-02 | 2.87885350676498E-02 | -3.337276483155    |
| 8  | 0.4690484035888      | 3.12208927037098E-02 | -3.364039378027    |
| 14 | 0.763461254384       | 0.7681878381843      | -3.822454533169    |
| 14 | 0.2442264203775      | 0.94819967703427     | -3.84513703312     |
| 8  | 0.5300111845632      | 0.6771721492971      | -4.113710665948    |
| 8  | 0.975653685218       | 0.6795693335403      | -4.14906099296     |
| 14 | 0.231077435344       | 0.4115685699438      | -4.661236903047    |
| 8  | 0.3132744959282      | 0.2751960070359      | -4.524568298527    |
| 8  | 0.7735914967076      | 0.2060248913581      | -4.364683950679    |
| 12 | 0.7511551260219      | 3.13461637383599E-02 | -4.416041702519    |
| 12 | 0.7533318375215      | 0.5399636340732      | -4.478650085566    |
| 8  | 0.7172281562425      | 0.8643732313344      | -5.024809092641    |
| 8  | 0.2279624990547      | 0.91041718584208     | -5.380130292656    |
| 8  | 0.46074539773        | 0.4702071022121      | -5.512938067131    |
| 8  | 0.97292942661007     | 0.4284188667612      | -5.386120963062    |
| 12 | 0.4139654969723      | 0.7789693034876      | -5.507392788461    |
| 12 | 0.6467536820302      | 0.3291262443529      | -5.429420327688    |

-1 0 0 0

GROUP

P1

TITLE

110-Fe8\_T

CELL

5.7568094400 11.3438663500 1.0000000000 90.000000 90.000000 91.782465

COORD

|    |                      |                      |                   |
|----|----------------------|----------------------|-------------------|
| 12 | 0.558749576361099    | 8.34366541178399E-02 | 2.333950660008    |
| 12 | 0.358510536858899    | 0.5424372334308      | 2.164546959031    |
| 8  | 2.80857593529892E-02 | 0.4411923205697      | 2.1182392638      |
| 8  | 0.539411448926299    | 0.3988628241395      | 2.258457472438    |
| 8  | 0.769996871217099    | 0.96447838067119     | 2.206119684858    |
| 8  | 0.272311428448599    | 0.99763490690872     | 1.692764647701    |
| 12 | 0.248849412263699    | 0.3289963857815      | 1.234248143937    |
| 26 | 0.252270375952199    | 0.8320536114662      | 1.156108032821    |
| 8  | 0.228137461350899    | 0.66294061655        | 1.059605444375    |
| 8  | 0.687595693616199    | 0.5930200510604      | 1.288294322611    |
| 14 | 0.769853860012299    | 0.4563553974351      | 1.415713812783    |
| 8  | 3.01020861885191E-02 | 0.1909205094382      | 0.855575283111404 |

|    |                      |                      |                    |
|----|----------------------|----------------------|--------------------|
| 8  | 0.468613012041199    | 0.1880982032633      | 0.903767494009404  |
| 14 | 0.759169687162199    | 0.92154766546379     | 0.691151871116404  |
| 14 | 0.235331539687199    | 0.100027153149       | 0.541910659329004  |
| 8  | 0.539735489523299    | 0.8348033443735      | 0.226188424775804  |
| 8  | 0.967686438172689    | 0.8377227226629      | 0.183201672038804  |
| 14 | 0.244350406237399    | 0.5969100935084      | -0.366436433957796 |
| 8  | 0.259111225173599    | 0.4503150409321      | -0.243481771449996 |
| 8  | 0.762204828421299    | 0.3980685341511      | -0.132841658234896 |
| 12 | 0.754211687760899    | 0.2082604489001      | -0.304492017085896 |
| 12 | 0.745100399610699    | 0.6934262186492      | -0.356034153682596 |
| 8  | 0.753529909985699    | 2.29199817771499E-02 | -0.515077143591096 |
| 8  | 0.249395440526399    | 4.19090858388899E-02 | -0.926740093726396 |
| 8  | 0.468254325777599    | 0.6230752235279      | -1.3344267943      |
| 8  | 0.012966203042019    | 0.6142350651437      | -1.277405923871    |
| 12 | 0.999078596284132    | 0.93275116940418     | -1.596867846589    |
| 12 | 0.501048625278599    | 0.9319575796514      | -1.587643652557    |
| 12 | 0.999320852712813    | 0.4326831928382      | -1.626132106877    |
| 12 | 0.500391820795799    | 0.4331660748786      | -1.62900264919     |
| 8  | 0.985894950101129    | 0.2523205248935      | -1.985366013058    |
| 8  | 0.534002059459199    | 0.2441657590654      | -1.912931229157    |
| 8  | 0.751887255547799    | 0.8260639598294      | -2.338218820578    |
| 8  | 0.247248766912399    | 0.8420094714681      | -2.663938213866    |
| 12 | 0.256650802685199    | 0.1718334550896      | -2.843581203098    |
| 12 | 0.244124110319999    | 0.6583180730177      | -2.933659563385    |
| 8  | 0.236770175060299    | 0.4692751836108      | -3.111129716743    |
| 8  | 0.740461507325999    | 0.4161905068194      | -3.017487359531    |
| 14 | 0.755673530804299    | 0.2690113698616      | -2.911246946042    |
| 8  | 3.13814894436191E-02 | 2.78093134683299E-02 | -3.345245922472    |
| 8  | 0.468430928728399    | 2.94989286696599E-02 | -3.359798021735    |
| 14 | 0.763702604194599    | 0.767442455118       | -3.815214603046    |
| 14 | 0.245126483057599    | 0.94623607942438     | -3.837239367093    |
| 8  | 0.530494901309399    | 0.6777063134424      | -4.122654010664    |
| 8  | 0.972141601020819    | 0.6777366469533      | -4.124032886575    |
| 14 | 0.229570041462899    | 0.4106627988005      | -4.657522900794    |
| 8  | 0.311699330231999    | 0.2740091413512      | -4.517788823996    |
| 8  | 0.770944013413799    | 0.2050552898636      | -4.355062681501    |
| 12 | 0.751414185242099    | 3.03774546956099E-02 | -4.385641224327    |
| 12 | 0.752573804583099    | 0.5389278019618      | -4.474436565949    |
| 8  | 0.723616604655399    | 0.8641521587309      | -5.026613404353    |
| 8  | 0.232279818403299    | 0.90720755267966     | -5.369756379204    |
| 8  | 0.458889337756899    | 0.4692142533545      | -5.50458247555     |
| 8  | 0.972557297755839    | 0.4272962616074      | -5.373164043156    |
| 12 | 0.426629438768499    | 0.7803357467824      | -5.540442990817    |
| 12 | 0.642459963011999    | 0.3276592091517      | -5.415671440064    |

-1 0 0 0

GROUP

P1

TITLE

H2\_001-Fe1\_Q

CELL

4.7612867100 9.7759330900 1.0000000000 90.000000 90.000000 91.613060

COORD

|    |                       |                   |                |
|----|-----------------------|-------------------|----------------|
| 26 | 0.43541699548         | 0.436644435228    | 4.342773559022 |
| 8  | 0.385605850946        | 0.236383406058001 | 4.145442063986 |
| 12 | 3.756542788000002E-03 | 0.257130618627    | 2.605832120111 |
| 14 | 0.456071378166        | 0.104462814716    | 3.161076482967 |
| 8  | 0.170383690952        | 0.435924558582001 | 2.763235802788 |

```

8 0.291132819103999 0.14827921969 1.725681839635
12 0.479015798244001 0.216376331008 0.040125580555997
8 0.250530920379 0.40793183565 3.27689861159963E-02
8 0.267205235375 0.165352509062 -1.64556589335801
14 0.413524403226999 9.20199266070001E-02 -2.952590379547
8 0.223293479144 0.440219861993 -2.871668229066
8 0.269617318040999 0.168587911237001 -4.247934251486
8 0.283063454021 0.424022598735001 -5.944256436583
-1 0 0 0
GROUP
P1

TITLE
H2_001-Fe1_s
CELL
4.7491613500 9.7674784100 1.0000000000 90.000000 90.000000 91.675382
COORD
26 0.430136141450999 0.4385173682981 4.260372098336
8 0.233460741499699 0.6252555365484 4.38028594251
8 0.381185176564799 0.2372679182713 4.140631207059
12 3.98480527763645E-03 0.256795662825 2.644181571718
12 0.474419823828499 0.7709515185524 3.025115045025
14 0.452865007275499 0.1044907394594 3.168279287763
14 4.69594811516394E-02 0.5845699766227 3.073916035129
8 0.788475330301299 0.09226155129385 3.042705337993
8 0.702960249704899 0.5744898708193 3.146340010571
8 0.185275007495299 0.4339447636394 2.775987801469
8 0.307744873581399 0.95027993371941 3.343536978099
8 0.289032631256299 0.1476818653024 1.72399591479
8 0.192785735395999 0.668251212396 1.804280040157
12 1.68919563180194E-02 0.98256158932165 1.79665312786
12 0.485526559718399 0.5010321055248 1.490402335937
8 0.751328336643599 0.3332178433232 1.270160340852
8 0.717470963570999 0.8294860060676 1.415460374108
12 3.6495411463544E-03 0.7266034281797 6.27856746033093E-02
12 0.480272827057099 0.2155504951245 5.55852297722594E-02
14 0.574137286139399 0.90632457122193 0.119206079273999
14 0.914514672621189 0.4059066575706 5.28309354755931E-03
8 0.232657842243799 0.90720902883467 0.119673955803599
8 0.254537333094199 0.4076508439613 3.07896606064093E-02
8 0.766640212318599 0.5576272471327 6.93323890304594E-02
8 0.734358549547899 0.05701045153141 7.93840263409094E-02
8 0.721843418505099 0.8336520493624 -1.185361370844
8 0.762328956038099 0.3373577481104 -1.306599884556
12 0.995086226048205 0.99959593505899 -1.40896018276
12 0.495665941632599 0.499851109218 -1.39882123089
8 0.229235610745399 0.6616636386921 -1.506972916577
8 0.268695704514199 0.1655042764923 -1.63707585631
12 0.986533813759359 0.2717751045723 -2.87356541907
12 0.510222832042099 0.7837818519591 -2.872038435542
14 0.414805388538799 0.09232906604276 -2.944732479859
14 7.85735768367894E-02 0.5926884544768 -2.820819312955
8 0.756442075366199 0.09131490951101 -2.940364873201
8 0.738559142733 0.5911966607724 -2.833214710389
8 0.224990468239599 0.4405878735385 -2.875680877311
8 0.254694100584699 0.9417540603748 -2.894940002676
8 0.271388056206499 0.1692583768961 -4.240821727328
8 0.244720831123299 0.665211909193 -4.07967365711

```

|    |                   |                  |                 |
|----|-------------------|------------------|-----------------|
| 12 | 0.967733226801509 | 0.01783515923709 | -4.630121144086 |
| 12 | 0.510398836816499 | 0.4943966945143  | -4.268709389601 |
| 8  | 0.793364086130999 | 0.3287722404139  | -4.601969369351 |
| 8  | 0.696149770066499 | 0.8519274996419  | -4.551820267248 |
| 12 | 0.984666601572679 | 0.7426028236583  | -5.41204884613  |
| 12 | 0.516720054935799 | 0.2272355948044  | -5.860034405991 |
| 14 | 0.530477992949999 | 0.8931262502482  | -6.001461364496 |
| 14 | 0.942292146164599 | 0.4129022189032  | -5.863359121557 |
| 8  | 0.195166363056799 | 0.90724005166607 | -5.850057731853 |
| 8  | 0.285132835195599 | 0.4250033218448  | -5.946218350368 |
| 8  | 0.814012372240599 | 0.5639313596563  | -5.557549082235 |
| 8  | 0.676389678618999 | 0.04745119721126 | -6.187921071621 |
| 8  | 0.591834354011599 | 0.7603160997215  | -6.968987644044 |
| 8  | 0.766310513503199 | 0.3713753555038  | -7.19269538225  |
| 12 | 0.550071836534199 | 0.5590246388431  | -7.022128770457 |
| 1  | 0.658570157103999 | 0.4512606435036  | 5.605112892271  |
| 1  | 0.508513639182799 | 0.4285916306487  | 5.88686807608   |

-1 0 0 0  
GROUP  
P1  
TITLE  
H2\_001-Fe4\_S  
CELL  
4.7519682300 9.7541002900 1.0000000000 90.000000 90.000000 90.866064  
COORD

|    |                      |                |                      |
|----|----------------------|----------------|----------------------|
| 12 | 0.461062174445       | 0.437162381944 | 4.175154745716       |
| 8  | 0.343614916371       | 0.230000534233 | 4.17449755031        |
| 26 | 8.90132901299989E-03 | 0.266087038915 | 2.919451370846       |
| 14 | 0.441727095937       | 0.106826244247 | 3.133917843352       |
| 8  | 0.208084580088       | 0.435471532833 | 2.651725105637       |
| 8  | 0.270475090675       | 0.162071545952 | 1.744927122533       |
| 12 | 0.489147911284       | 0.218747565304 | 7.57206764539986E-02 |
| 8  | 0.274858274297       | 0.406540040558 | 9.02502023599872E-03 |
| 8  | 0.280911591521       | 0.163766628875 | -1.627793844006      |
| 14 | 0.427400870623       | 0.090595753182 | -2.939177699575      |
| 8  | 0.242888270173       | 0.437860648538 | -2.864679297584      |
| 8  | 0.283800541813       | 0.167372716994 | -4.238757273635      |
| 8  | 0.301086230738       | 0.422051041842 | -5.937909181119      |

-1 0 0 0  
GROUP  
P1  
TITLE  
H2\_010-Fe1\_Q  
CELL  
4.7485108900 12.0527551900 1.0000000000 90.000000 90.000000 89.999184  
COORD

|    |                      |                |                 |
|----|----------------------|----------------|-----------------|
| 8  | 0.237491017009       | 0.374937593426 | 3.033975668145  |
| 8  | 0.230379256051       | 0.124701087346 | 2.7736513386    |
| 12 | 0.481384434898       | 0.495205727526 | 2.276419446321  |
| 12 | 0.481382020791       | 0.254679692279 | 2.276435557725  |
| 14 | 7.07630402419999E-02 | 0.124725558101 | 1.262865661007  |
| 8  | 0.220160415667       | 0.233581842776 | 0.600849977442  |
| 8  | 0.221400960531       | 0.015963157259 | 0.597143868743  |
| 12 | 3.49277602799995E-03 | 0.374951341883 | 0.115634438126  |
| 8  | 0.226732627289       | 0.374941223754 | -1.755977179557 |
| 8  | 0.253429074139       | 0.125629549131 | -2.107415388928 |
| 14 | 0.409317975116       | 0.126087409513 | -3.612265658437 |

```

8 0.267889655694 0.016417996907 -4.30977032831
8 0.272633227935 0.238854328102 -4.278096796596
26 0.449123538753 0.374932724853 -4.630816555741
-1 0 0 0
GROUP
P1

TITLE
H2_010-Fe1_S
CELL
4.7450551200 12.0237221200 1.0000000000 90.000000 90.000000 89.997664
COORD
8 0.2501622155 0.374503346262 3.044703206515
8 0.243035915831 0.124266582432 2.775109675626
12 0.493616782347 0.494721248699 2.278914854095
12 0.493648352734 0.254289407679 2.278859242616
14 8.369963568199999E-02 0.124321305889 1.263522304903
8 0.232188622062 0.233567253402 0.602344954115
8 0.235416030336 0.015378334551 0.600694597522
12 1.199740515499999E-02 0.37451533408 0.105254968094
8 0.231336874056 0.374529578406 -1.744795026418
8 0.270318020991 0.12554466483 -2.099773700983
12 3.34575376799992E-03 5.18840602000002E-03 -2.65471660003
14 0.429829875048 0.127174549806 -3.596096407458
8 0.287713320101 0.017652061321 -4.305872992242
8 0.297801501384 0.241617711066 -4.246186707589
26 0.471415278465 0.374473596864 -4.672319192882
1 0.212491228053 0.374537186418 -5.879524120249
1 0.354420497898 0.374370320807 -6.296162655862
-1 0 0 0
GROUP
P1

TITLE
H2_010-Fe1_T
CELL
4.7398803300 12.1023219800 1.0000000000 90.000000 90.000000 90.017741
COORD
8 0.24961548555 0.374669444419 3.029015807276
8 0.243046316211 0.124960382051 2.776839978651
12 0.492788571001 0.494532579937 2.273344334013
12 0.492792332698 0.254804756151 2.273901457457
14 8.37799182090001E-02 0.124890139611 1.264482339862
8 0.231334193093 0.233570122705 0.5967614992
8 0.234487171526 0.016255883165 0.609088162538
12 1.25300306230001E-02 0.374631382078 9.84015499919997E-02
8 0.231566107176 0.374701082919 -1.784922601587
8 0.268879185986 0.124807312289 -2.084986080826
12 3.69042426900006E-03 3.71438096600003E-03 -2.621355778299
14 0.428617604567 0.123396635287 -3.581471356501
8 0.285673201618 0.014113516266 -4.271603546647
8 0.297668662456 0.234282669524 -4.272510464097
26 0.43583298851 0.375173975648 -4.585621801573
1 0.211348329363 0.371940135855 -6.008706787261
1 0.363135607983 0.378313087051 -6.309625725432
-1 0 0 0
GROUP
P1

```

TITLE  
H2\_110-Fe2\_Q  
CELL  
5.7533995700 11.3294662200 1.0000000000 90.000000 90.000000 91.684764  
COORD  
8 0.023264214681 0.43350923781 2.139028989077  
8 0.286222973629 2.00240825900005E-03 1.807640645431  
12 0.251361556502 0.331181753281 1.241921464607  
8 0.031976865976 0.188792997681 0.891609483260001  
8 0.475304401218 0.190120471236 0.896536139986001  
14 0.242300119405 9.94155623800001E-02 0.604649141811001  
8 0.258202295631 0.444191214037 -0.279480611208998  
8 0.253769199248 0.038628945188 -0.858502853275998  
12 1.23735347300001E-03 0.43209015902 -1.645609640983  
12 0.260252844294 0.172892182583 -2.88544042734  
8 0.238904563167 0.468352620342 -3.130800344992  
8 0.035298239385 0.02787540074 -3.349580947136  
8 0.471500366119 0.029786960851 -3.374579677778  
14 0.233006835802 0.410929675223 -4.68152585887  
8 0.315839437484 0.27396858962 -4.550056500675  
8 0.462509576257 0.469620135514 -5.523901827998  
-1 0 0 0  
GROUP  
P1

TITLE  
H2\_110-Fe2\_S  
CELL  
5.7314367600 11.4097592200 1.0000000000 90.000000 90.000000 91.820962  
COORD  
8 0.027757753113 0.437932271456 2.123807448298  
8 0.278820965512 1.79184760799996E-03 1.83912589788  
12 0.248183255295 0.322920494582 1.326245877901  
8 0.026468975592 0.186822462504 0.920943197308001  
8 0.470264472511 0.186562790454 0.905317108477002  
14 0.236187462137 0.097016999073 0.623869651123002  
8 0.270364129067 0.456636133224 -9.43766963729984E-02  
8 0.246783687292 0.038178720406 -0.844035952162998  
12 0.003758486468 0.432345010317 -1.583128523856  
12 0.257022586112 0.173718842287 -2.847459702576  
8 0.239783602555 0.4686869144 -3.057370073014  
8 0.029953684869 0.029983473196 -3.326333525881  
8 0.466712698045 3.15479050079999E-02 -3.345328156933  
14 0.23096199049 0.411529163919 -4.615246699794  
8 0.312089440231 0.275422823632 -4.500219730429  
8 0.460269228853 0.470020538321 -5.460810828446  
-1 0 0 0  
GROUP  
P1

TITLE  
H2\_110-Fe2\_T  
CELL  
5.7951927500 11.3164614300 1.0000000000 90.000000 90.000000 91.750189  
COORD  
8 1.35573542250001E-02 0.426729576353 2.133200836115  
8 0.282817409574 0.003849327674 1.807700607019

12 0.253618611694 0.334410541906 1.282908565874  
8 3.69897485240001E-02 0.191746111382 0.861701449401002  
8 0.477919815467 0.191713101608 0.927114935456001  
14 0.244768233102 0.10223407428 0.603308722409001  
8 0.256159050808 0.444527671447 -0.271471804930999  
8 0.256348569993 0.040426295643 -0.857976607769999  
12 6.39851299000062E-04 0.432873063512 -1.633289351439  
12 0.498398705862 0.430097443016 -1.639314415765  
12 0.260377996396 0.17302665515 -2.869049947805  
8 0.237562519186 0.46896003873 -3.115874356528  
8 3.71530785630001E-02 0.027397210015 -3.35086650463  
8 0.471070251508 0.029096854907 -3.37199701715  
14 0.231088738312 0.41163286901 -4.667445981722  
8 0.313996811608 0.274486595252 -4.537854355074  
8 0.460562383511 0.470379670242 -5.504785254362

-1 0 0 0

GROUP

P1

TITLE

H2\_110-Fe8\_Q

CELL

5.6475750700 11.3873153900 1.0000000000 90.000000 90.000000 91.223132

COORD

8 0.045008760442 0.433154313284 2.12657753663399  
12 0.271815612101 0.324083691405 1.209767987288  
8 0.031832243693 0.186215401873 0.954041344626996  
8 0.489057215885 0.183687445767 0.907927082216995  
14 0.25615334543 0.091389856015 0.675562267197996  
8 0.267599920993 0.446846547446 -0.255176674602005  
8 0.25864273418 0.042072841984 -0.844187239562004  
12 0.007917329895 0.433482339441 -1.654455476797  
12 0.26259855445 0.176736336929 -2.911496905392  
8 0.242695575588 0.472822865281 -3.149792198807  
8 0.026699203291 0.0334018601 -3.270331845359  
8 0.471847911393 0.036644073572 -3.378791981931  
14 0.241029930581 0.415262763301 -4.701979158154  
8 0.323580148892 0.278938974392 -4.567665693525  
8 0.469637886652 0.473817038893 -5.557113419778

-1 0 0 0

GROUP

P1

TITLE

H2\_110-Fe8\_S

CELL

5.6775987400 11.3855784400 1.0000000000 90.000000 90.000000 91.693677

COORD

8 0.019675514892 0.438034084549 2.143813828442  
8 0.278824452441 4.48744850999996E-04 1.742722812509  
12 0.239877591224 0.326783554134 1.230998403139  
8 0.017034800409 0.186814955684 0.905669850315997  
8 0.463864852116 0.189746551142 0.872102209356997  
14 0.23065177267 0.098112825093 0.571318766494997  
8 0.251349084733 0.450969698401 -0.226881760282002  
8 0.243274098394 0.042301220479 -0.908006175543003  
12 0.493821211055 0.433861656341 -1.625059000114  
12 0.250246282799 0.17323790104 -2.863056643167

|    |                |                |                 |
|----|----------------|----------------|-----------------|
| 8  | 0.231251515465 | 0.470187129552 | -3.116632304068 |
| 8  | 0.021714987948 | 0.029563072395 | -3.330051456981 |
| 8  | 0.463610142236 | 0.032262395102 | -3.358300079424 |
| 14 | 0.226235275688 | 0.412149059491 | -4.664560801671 |
| 8  | 0.308522736301 | 0.275885960368 | -4.530125068925 |
| 8  | 0.455780463197 | 0.470843265157 | -5.51854569249  |

-1 0 0 0  
GROUP  
P1

TITLE  
H2\_110-Fe8\_T  
CELL  
5.7159175600 11.3663282900 1.0000000000 90.000000 90.000000 91.894183  
COORD

|    |                      |                      |                    |
|----|----------------------|----------------------|--------------------|
| 12 | 0.5971144637933      | 9.14566838420197E-02 | 2.235800776689     |
| 12 | 0.3624390412276      | 0.5386100424264      | 2.171268086149     |
| 8  | 3.48685483595605E-02 | 0.4388808869114      | 2.12987311952      |
| 8  | 0.5463912692815      | 0.3964987678324      | 2.257829593885     |
| 8  | 0.7776623932799      | 0.95802957566925     | 2.175580712657     |
| 8  | 0.2965618304497      | 1.25940634218767E-03 | 1.746362885609     |
| 12 | 0.252253630666       | 0.3272715432967      | 1.219816684395     |
| 26 | 0.2646507980257      | 0.8305501523563      | 1.382959644256     |
| 8  | 0.2370407042042      | 0.6610569468473      | 1.087915809483     |
| 8  | 0.6949665383177      | 0.5915667310661      | 1.289163204743     |
| 14 | 0.7765405768796      | 0.4550701111412      | 1.411758764092     |
| 8  | 2.96224867484205E-02 | 0.186179746734       | 0.909393584961302  |
| 8  | 0.4740949702672      | 0.1911947057558      | 0.849706094861502  |
| 14 | 0.7594099526516      | 0.91747679142971     | 0.646132303069702  |
| 14 | 0.2428860387193      | 9.83669000812097E-02 | 0.568740950811602  |
| 8  | 0.5296297403214      | 0.8349475558901      | 0.193602700827302  |
| 8  | 0.97201579390103     | 0.8361129225244      | 0.143792297722902  |
| 14 | 0.2526073709705      | 0.5976147490533      | -0.352813600675698 |
| 8  | 0.2655641385887      | 0.4507074396698      | -0.238210231882998 |
| 8  | 0.7703928973594      | 0.3973754884509      | -0.137932130908398 |
| 12 | 0.7621672594091      | 0.2081347068243      | -0.349892004804798 |
| 12 | 0.7516393335069      | 0.6930336830122      | -0.363173147290498 |
| 8  | 0.7544406738968      | 2.20297000472997E-02 | -0.518322622596898 |
| 8  | 0.250921118893       | 4.16202286633897E-02 | -0.906234705328898 |
| 8  | 0.4762910975002      | 0.6223635949044      | -1.33919911223     |
| 8  | 2.03806300485605E-02 | 0.6145146818872      | -1.274983310184    |
| 12 | 3.62610829839138E-03 | 0.93145758759089     | -1.596402018495    |
| 12 | 0.5019145724415      | 0.93260707014725     | -1.603345246915    |
| 12 | 5.93434795686733E-03 | 0.4340064987347      | -1.634241782397    |
| 12 | 0.5061549490692      | 0.4333734677258      | -1.635731431129    |
| 8  | 0.991941943352732    | 0.2533383677645      | -1.992349283054    |
| 8  | 0.5385647178658      | 0.2452441206466      | -1.935904787547    |
| 8  | 0.7539140011934      | 0.8264089051959      | -2.357515938964    |
| 8  | 0.2504225372323      | 0.8428512573792      | -2.692880946477    |
| 12 | 0.2609178318967      | 0.1729469254906      | -2.867312155515    |
| 12 | 0.2486651541572      | 0.6588669466638      | -2.92820504929     |
| 8  | 0.242671367635       | 0.469882075983       | -3.124067203156    |
| 8  | 0.7471931896284      | 0.4172553612584      | -3.030603424742    |
| 14 | 0.7614064477162      | 0.2703857098568      | -2.933878506586    |
| 8  | 3.25458604364905E-02 | 2.89335661132597E-02 | -3.339183440624    |
| 8  | 0.4714960870574      | 3.13485596096697E-02 | -3.366589052471    |
| 14 | 0.7664180593656      | 0.7683702447729      | -3.834596081442    |
| 14 | 0.2468683604081      | 0.94813687460231     | -3.849208811567    |



|    |                      |                      |                 |
|----|----------------------|----------------------|-----------------|
| 8  | 0.5328403884438      | 0.6776757143682      | -4.136175295175 |
| 8  | 0.97763428876925     | 0.679316305778       | -4.145953474877 |
| 14 | 0.2354680902474      | 0.4116568227023      | -4.672044187518 |
| 8  | 0.3171947349808      | 0.2751689736184      | -4.536450616722 |
| 8  | 0.7778628006156      | 0.2062292279444      | -4.37460267177  |
| 12 | 0.7543433603678      | 3.13287959985797E-02 | -4.408115130003 |
| 12 | 0.7568714059387      | 0.5400645908737      | -4.491207259296 |
| 8  | 0.7228440932409      | 0.8648586056911      | -5.040054228776 |
| 8  | 0.2323207682784      | 0.91060930091554     | -5.385753063504 |
| 8  | 0.4652884133313      | 0.4699802996261      | -5.524109975819 |
| 8  | 0.97754332649368     | 0.428526295284       | -5.392490441355 |
| 12 | 0.420598051734       | 0.7805425719945      | -5.528535767898 |
| 12 | 0.6499355819632      | 0.3287543829669      | -5.442094616466 |
| 1  | 3.43109314581304E-02 | 0.8445262207713      | 2.761058203128  |
| 1  | 0.1216262129697      | 0.7992926259412      | 3.029887867662  |

-1 0 0 0  
GROUP  
P1

## Optimized cartesian coordinates of the molecular systems

NCl-Fe12\_Q  
8 -1.712193 -0.290966 1.010619  
12 -0.096229 -2.753691 0.603965  
8 -1.842917 -2.667900 -0.172666  
14 -2.235867 -1.146519 -0.492881  
8 -3.640578 -0.356520 -0.565020  
12 -2.938642 1.190341 0.380519  
8 -1.613007 2.420735 -0.222748  
12 -0.057828 2.700561 0.946553  
8 1.518529 2.839830 -0.196008  
14 1.905569 1.353291 -0.648319  
8 3.170529 0.488479 -0.138054  
26 2.253523 -1.085661 0.459405  
8 1.359278 -2.374380 -0.616498  
12 0.669490 -1.013679 -1.802783  
8 -1.223684 -0.537276 -1.690691  
12 -0.665463 1.360572 -1.541202  
8 1.246236 0.907895 -2.127691  
14 -0.191055 0.032256 1.617979  
8 0.562865 -1.389099 1.923734  
8 0.600805 0.435819 0.156943  
8 -0.204435 1.407328 2.430071

NCl-Fe12\_S  
8 -1.712182 -0.180943 0.986396  
12 -0.347494 -2.786062 0.488504  
8 -2.077229 -2.481899 -0.295650  
14 -2.306534 -0.918293 -0.551270  
8 -3.615744 0.027695 -0.599297  
12 -2.771026 1.434422 0.442995  
8 -1.322295 2.535581 -0.141494  
12 0.244035 2.589231 1.049353  
8 1.859428 2.648911 -0.041654  
14 2.049722 1.185952 -0.653819  
8 3.191284 0.082071 -0.371511  
26 2.010698 -1.169094 0.494796  
8 1.156202 -2.406044 -0.653562  
12 0.632978 -0.980796 -1.816313  
8 -1.226675 -0.357404 -1.710276  
12 -0.607113 1.509742 -1.608359  
8 1.239174 0.941170 -2.095543  
14 -0.195468 -0.068254 1.662466  
8 0.371310 -1.582555 1.906789  
8 0.767213 0.285593 0.272948  
8 -0.100837 1.288619 2.500084

NCl-Fe12\_T  
8 -1.685951 -0.358533 1.046147  
12 -0.077829 -2.758617 0.506141  
8 -1.843989 -2.688658 -0.217196  
14 -2.240209 -1.157476 -0.491811  
8 -3.639737 -0.356771 -0.503467  
12 -2.923630 1.156926 0.485645  
8 -1.638123 2.424482 -0.133771  
12 -0.019279 2.655229 0.976603  
8 1.592277 2.845669 -0.127266  
14 1.868523 1.370417 -0.684226  
8 3.089490 0.388036 -0.275876

|            |           |           |           |
|------------|-----------|-----------|-----------|
| 26         | 2.261401  | -1.112667 | 0.526146  |
| 8          | 1.386408  | -2.265666 | -0.659786 |
| 12         | 0.673244  | -0.908723 | -1.818808 |
| 8          | -1.253222 | -0.524745 | -1.693602 |
| 12         | -0.746333 | 1.387957  | -1.514448 |
| 8          | 1.165288  | 1.020592  | -2.167073 |
| 14         | -0.149925 | 0.007755  | 1.580316  |
| 8          | 0.665210  | -1.411829 | 1.803407  |
| 8          | 0.508588  | 0.521075  | 0.097949  |
| 8          | -0.142231 | 1.337140  | 2.460372  |
| NCl-Fe14_Q |           |           |           |
| 8          | -1.714409 | 0.343104  | 0.991810  |
| 12         | -0.884253 | -2.455242 | 1.090126  |
| 8          | -2.476610 | -2.043248 | 0.125444  |
| 14         | -2.363381 | -0.552861 | -0.457563 |
| 8          | -3.457592 | 0.586530  | -0.780566 |
| 12         | -2.387666 | 1.996469  | 0.015363  |
| 8          | -0.721738 | 2.675927  | -0.611838 |
| 12         | 0.766639  | 2.716685  | 0.668014  |
| 8          | 2.416529  | 2.207874  | -0.230504 |
| 14         | 2.344495  | 0.624202  | -0.468102 |
| 8          | 3.223259  | -0.510170 | 0.256679  |
| 12         | 1.823764  | -1.514803 | 1.157481  |
| 8          | 0.734713  | -2.714827 | 0.061644  |
| 26         | 0.616840  | -1.502972 | -1.369574 |
| 8          | -1.138984 | -0.461217 | -1.594544 |
| 12         | -0.071220 | 1.190853  | -1.679150 |
| 8          | 1.660823  | 0.199893  | -1.947618 |
| 14         | -0.212576 | 0.367153  | 1.704332  |
| 8          | 0.111566  | -1.137109 | 2.307993  |
| 8          | 0.781225  | 0.259924  | 0.327176  |
| 8          | 0.110650  | 1.809672  | 2.305019  |
| NCl-Fe14_S |           |           |           |
| 8          | -1.703681 | 0.529082  | 0.937488  |
| 12         | -1.025001 | -2.251329 | 1.260932  |
| 8          | -2.626273 | -1.879510 | 0.298416  |
| 14         | -2.360812 | -0.472537 | -0.416366 |
| 8          | -3.326630 | 0.693787  | -0.956933 |
| 12         | -2.253597 | 2.129099  | -0.203016 |
| 8          | -0.545243 | 2.640625  | -0.846606 |
| 12         | 0.936735  | 2.662367  | 0.454752  |
| 8          | 2.545782  | 2.031438  | -0.530555 |
| 14         | 2.395463  | 0.435111  | -0.457353 |
| 8          | 3.216404  | -0.625230 | 0.415904  |
| 12         | 1.688346  | -1.443120 | 1.276493  |
| 8          | 0.569918  | -2.633223 | 0.232013  |
| 26         | 0.487323  | -1.728368 | -1.363084 |
| 8          | -1.056853 | -0.611827 | -1.474999 |
| 12         | 0.051675  | 1.000307  | -1.680585 |
| 8          | 1.635420  | -0.221618 | -1.817118 |
| 14         | -0.229372 | 0.584051  | 1.719664  |
| 8          | 0.010623  | -0.904647 | 2.400938  |
| 8          | 0.850021  | 0.422508  | 0.426505  |
| 8          | 0.090236  | 2.073231  | 2.201703  |
| NCl-Fe14_T |           |           |           |
| 8          | -1.703367 | 0.524685  | 0.959261  |
| 12         | -1.149486 | -2.360866 | 1.120218  |
| 8          | -2.690743 | -1.799523 | 0.145612  |

|    |           |           |           |
|----|-----------|-----------|-----------|
| 14 | -2.366024 | -0.359114 | -0.468289 |
| 8  | -3.284669 | 0.875527  | -0.942169 |
| 12 | -2.176250 | 2.212956  | -0.071390 |
| 8  | -0.445378 | 2.722160  | -0.663488 |
| 12 | 1.015305  | 2.607566  | 0.657107  |
| 8  | 2.644850  | 1.975561  | -0.225708 |
| 14 | 2.403746  | 0.404061  | -0.435082 |
| 8  | 3.141273  | -0.816015 | 0.306757  |
| 12 | 1.611677  | -1.640877 | 1.176908  |
| 8  | 0.424525  | -2.760254 | 0.078784  |
| 26 | 0.489355  | -1.575006 | -1.370031 |
| 8  | -1.059647 | -0.451498 | -1.534707 |
| 12 | 0.078162  | 1.164449  | -1.686759 |
| 8  | 1.686579  | 0.024226  | -1.913240 |
| 14 | -0.221237 | 0.430502  | 1.719108  |
| 8  | -0.056170 | -1.100700 | 2.319429  |
| 8  | 0.815197  | 0.264340  | 0.385711  |
| 8  | 0.189186  | 1.853382  | 2.314695  |

NCl-Fe16\_Q

|    |           |           |           |
|----|-----------|-----------|-----------|
| 8  | 1.606207  | -0.187887 | 1.102411  |
| 12 | 1.277774  | 2.652738  | 0.430585  |
| 8  | 2.802716  | 1.740876  | -0.277980 |
| 14 | 2.421235  | 0.197372  | -0.482359 |
| 8  | 3.291478  | -1.161408 | -0.459973 |
| 12 | 1.982410  | -2.109213 | 0.603354  |
| 8  | 0.222915  | -2.673773 | 0.098934  |
| 12 | -1.271468 | -2.067274 | 1.256251  |
| 8  | -2.802027 | -1.558976 | 0.167803  |
| 14 | -2.419602 | -0.124184 | -0.442332 |
| 8  | -3.084212 | 1.289169  | -0.073552 |
| 12 | -1.533251 | 2.245663  | 0.607144  |
| 8  | -0.255210 | 2.849974  | -0.709634 |
| 12 | -0.279054 | 1.282461  | -1.810574 |
| 8  | 1.204660  | 0.033085  | -1.618684 |
| 26 | -0.190935 | -1.464423 | -1.301558 |
| 8  | -1.653526 | -0.195856 | -1.944811 |
| 14 | 0.126495  | 0.238411  | 1.732573  |
| 8  | 0.071208  | 1.874898  | 1.918806  |
| 8  | -0.830893 | 0.134472  | 0.328784  |
| 8  | -0.441616 | -0.937058 | 2.654029  |

NCl-Fe16\_S

|    |           |           |           |
|----|-----------|-----------|-----------|
| 8  | 1.671084  | -0.160456 | 1.083662  |
| 12 | 1.025715  | 2.715655  | 0.579038  |
| 8  | 2.572134  | 1.979954  | -0.255200 |
| 14 | 2.382184  | 0.405754  | -0.493534 |
| 8  | 3.437183  | -0.803207 | -0.584115 |
| 12 | 2.228182  | -2.005772 | 0.322794  |
| 8  | 0.517567  | -2.678364 | -0.064824 |
| 12 | -0.993596 | -2.368421 | 1.128408  |
| 8  | -2.394936 | -1.858162 | -0.155309 |
| 14 | -2.394191 | -0.271795 | -0.486551 |
| 8  | -3.203935 | 0.911555  | 0.217904  |
| 12 | -1.715006 | 2.049967  | 0.758540  |
| 8  | -0.530226 | 2.859707  | -0.534653 |
| 12 | -0.347642 | 1.397796  | -1.776583 |
| 8  | 1.135140  | 0.127214  | -1.582538 |
| 26 | -0.247886 | -1.245233 | -1.145927 |
| 8  | -1.724789 | -0.000804 | -1.982797 |

|    |           |           |          |
|----|-----------|-----------|----------|
| 14 | 0.153937  | 0.095199  | 1.706776 |
| 8  | -0.071619 | 1.702126  | 1.998263 |
| 8  | -0.757682 | 0.028708  | 0.246450 |
| 8  | -0.389150 | -1.146128 | 2.547416 |

NCl-Fe16\_T

|    |           |           |           |
|----|-----------|-----------|-----------|
| 8  | 1.633489  | -0.030283 | 1.100788  |
| 12 | 1.031007  | 2.775666  | 0.377622  |
| 8  | 2.569296  | 1.953801  | -0.412631 |
| 14 | 2.361825  | 0.369205  | -0.494090 |
| 8  | 3.381314  | -0.874930 | -0.475252 |
| 12 | 2.172534  | -1.934158 | 0.602864  |
| 8  | 0.477560  | -2.633419 | 0.111711  |
| 12 | -1.037839 | -2.127580 | 1.290445  |
| 8  | -2.610061 | -1.806047 | 0.190935  |
| 14 | -2.383461 | -0.339306 | -0.422129 |
| 8  | -3.197502 | 1.003867  | -0.091688 |
| 12 | -1.725449 | 2.097993  | 0.594325  |
| 8  | -0.522814 | 2.811790  | -0.744091 |
| 12 | -0.405589 | 1.228222  | -1.814717 |
| 8  | 1.111520  | 0.019003  | -1.573191 |
| 26 | -0.078475 | -1.490347 | -1.292625 |
| 8  | -1.607841 | -0.358669 | -1.921030 |
| 14 | 0.130411  | 0.295818  | 1.749464  |
| 8  | -0.043863 | 1.927578  | 1.910996  |
| 8  | -0.863702 | 0.121192  | 0.384591  |
| 8  | -0.314705 | -0.920471 | 2.685910  |

NCl-Fe2\_Q

|    |           |           |           |
|----|-----------|-----------|-----------|
| 8  | -1.125292 | 1.156419  | 0.968899  |
| 26 | -2.105230 | -1.529775 | 0.418951  |
| 8  | -3.097917 | -0.093007 | -0.308689 |
| 14 | -2.043287 | 1.096305  | -0.587056 |
| 8  | -2.201486 | 2.697554  | -0.667763 |
| 12 | -0.578229 | 3.017924  | 0.350013  |
| 8  | 1.208541  | 2.644113  | -0.197652 |
| 12 | 2.307466  | 1.551721  | 1.011358  |
| 8  | 3.361768  | 0.306392  | -0.049435 |
| 14 | 2.381378  | -0.856141 | -0.560013 |
| 8  | 2.331728  | -2.382855 | -0.064737 |
| 12 | 0.540479  | -2.499247 | 0.681093  |
| 8  | -0.904554 | -2.549757 | -0.627732 |
| 12 | -0.178211 | -1.203982 | -1.794305 |
| 8  | -0.924819 | 0.610415  | -1.739069 |
| 12 | 0.943393  | 1.263128  | -1.531359 |
| 8  | 1.718233  | -0.542292 | -2.074896 |
| 14 | 0.023121  | 0.124749  | 1.597680  |
| 8  | -0.647779 | -1.345678 | 1.923054  |
| 8  | 0.839553  | -0.305902 | 0.166843  |
| 8  | 1.099552  | 0.943453  | 2.445817  |

NCl-Fe2\_S

|    |           |           |           |
|----|-----------|-----------|-----------|
| 8  | -0.972545 | 1.315303  | 0.972665  |
| 26 | -2.271675 | -1.370371 | 0.384911  |
| 8  | -2.961644 | 0.180216  | -0.314849 |
| 14 | -1.859334 | 1.334682  | -0.579169 |
| 8  | -1.910633 | 2.944944  | -0.642764 |
| 12 | -0.242387 | 3.104318  | 0.355571  |
| 8  | 1.506003  | 2.511213  | -0.124916 |
| 12 | 2.429507  | 1.267794  | 1.090902  |
| 8  | 3.348902  | -0.043258 | -0.011099 |

|    |           |           |           |
|----|-----------|-----------|-----------|
| 14 | 2.271005  | -1.101666 | -0.553238 |
| 8  | 2.062727  | -2.616691 | -0.065276 |
| 12 | 0.251137  | -2.548929 | 0.634924  |
| 8  | -1.182026 | -2.418617 | -0.672779 |
| 12 | -0.313239 | -1.095519 | -1.768631 |
| 8  | -0.786826 | 0.800913  | -1.747754 |
| 12 | 1.146712  | 1.192010  | -1.506237 |
| 8  | 1.672554  | -0.695735 | -2.068426 |
| 14 | -0.018803 | 0.097549  | 1.571961  |
| 8  | -0.905988 | -1.275610 | 1.814546  |
| 8  | 0.770243  | -0.408343 | 0.151384  |
| 8  | 1.147064  | 0.701373  | 2.479295  |

NCl-Fe2\_T

|    |           |           |           |
|----|-----------|-----------|-----------|
| 8  | -1.155343 | 1.097283  | 0.979654  |
| 26 | -2.069937 | -1.556259 | 0.411283  |
| 8  | -3.067942 | -0.170423 | -0.376571 |
| 14 | -2.055594 | 1.069328  | -0.593716 |
| 8  | -2.258813 | 2.666756  | -0.610295 |
| 12 | -0.635621 | 2.983911  | 0.413085  |
| 8  | 1.160749  | 2.666617  | -0.142450 |
| 12 | 2.271515  | 1.562773  | 1.043189  |
| 8  | 3.348210  | 0.361531  | -0.046652 |
| 14 | 2.389004  | -0.808606 | -0.581721 |
| 8  | 2.367142  | -2.345229 | -0.114035 |
| 12 | 0.592204  | -2.508896 | 0.658987  |
| 8  | -0.875611 | -2.507041 | -0.624183 |
| 12 | -0.173972 | -1.146106 | -1.793661 |
| 8  | -0.916618 | 0.661825  | -1.751690 |
| 12 | 0.942264  | 1.321595  | -1.521640 |
| 8  | 1.724038  | -0.476271 | -2.090031 |
| 14 | 0.014040  | 0.078496  | 1.592433  |
| 8  | -0.610731 | -1.417813 | 1.898781  |
| 8  | 0.838805  | -0.296049 | 0.151282  |
| 8  | 1.070786  | 0.903110  | 2.459836  |

NCl-Fe6\_Q

|    |           |           |           |
|----|-----------|-----------|-----------|
| 8  | 1.397565  | 0.495085  | 0.998584  |
| 12 | -0.306356 | 2.857229  | 0.683092  |
| 8  | 1.422662  | 2.884543  | -0.135182 |
| 14 | 1.841805  | 1.379087  | -0.487682 |
| 8  | 3.290960  | 0.651656  | -0.604637 |
| 26 | 2.632762  | -0.986244 | 0.101784  |
| 8  | 1.349160  | -2.260971 | -0.333735 |
| 12 | -0.152399 | -2.598976 | 0.899434  |
| 8  | -1.756463 | -2.736799 | -0.200935 |
| 14 | -2.211109 | -1.246815 | -0.592284 |
| 8  | -3.453931 | -0.416506 | -0.011271 |
| 12 | -2.550653 | 1.116771  | 0.766225  |
| 8  | -1.792741 | 2.413297  | -0.452598 |
| 12 | -1.094193 | 1.181137  | -1.738428 |
| 8  | 0.834174  | 0.764612  | -1.686208 |
| 12 | 0.311631  | -1.147048 | -1.557438 |
| 8  | -1.610843 | -0.752265 | -2.085181 |
| 14 | -0.069933 | 0.048794  | 1.638427  |
| 8  | -0.914576 | 1.411003  | 2.028222  |
| 8  | -0.881119 | -0.333692 | 0.187371  |
| 8  | 0.015294  | -1.345205 | 2.408141  |

NCl-Fe6\_S

|   |          |          |          |
|---|----------|----------|----------|
| 8 | 1.467676 | 0.394560 | 0.952415 |
|---|----------|----------|----------|

|    |           |           |           |
|----|-----------|-----------|-----------|
| 12 | -0.228020 | 2.856859  | 0.728299  |
| 8  | 1.505101  | 2.836821  | -0.083668 |
| 14 | 1.840431  | 1.340838  | -0.540177 |
| 8  | 3.216970  | 0.496124  | -0.732703 |
| 26 | 2.531801  | -0.987862 | 0.148216  |
| 8  | 1.309693  | -2.224622 | -0.414030 |
| 12 | -0.174128 | -2.615502 | 0.835932  |
| 8  | -1.814126 | -2.714070 | -0.205262 |
| 14 | -2.219600 | -1.209062 | -0.582688 |
| 8  | -3.435079 | -0.349180 | 0.018947  |
| 12 | -2.479586 | 1.127938  | 0.841310  |
| 8  | -1.756105 | 2.456561  | -0.364160 |
| 12 | -1.153420 | 1.236843  | -1.711490 |
| 8  | 0.769465  | 0.842527  | -1.720330 |
| 12 | 0.321253  | -1.079925 | -1.622197 |
| 8  | -1.631404 | -0.701413 | -2.074431 |
| 14 | -0.010937 | -0.003039 | 1.633459  |
| 8  | -0.782016 | 1.387612  | 2.059056  |
| 8  | -0.871648 | -0.322228 | 0.201200  |
| 8  | 0.046659  | -1.406751 | 2.379944  |

NCl-Fe6\_T

|    |           |           |           |
|----|-----------|-----------|-----------|
| 8  | 1.447763  | 0.372130  | 0.968035  |
| 12 | -0.183502 | 2.872435  | 0.709504  |
| 8  | 1.551372  | 2.819925  | -0.083450 |
| 14 | 1.910028  | 1.316798  | -0.496754 |
| 8  | 3.317120  | 0.520590  | -0.605413 |
| 26 | 2.521194  | -1.061045 | 0.097737  |
| 8  | 1.244263  | -2.322572 | -0.341782 |
| 12 | -0.263105 | -2.626285 | 0.882184  |
| 8  | -1.877523 | -2.663778 | -0.207944 |
| 14 | -2.253624 | -1.154564 | -0.601119 |
| 8  | -3.456098 | -0.267969 | -0.016162 |
| 12 | -2.479100 | 1.204959  | 0.785726  |
| 8  | -1.688368 | 2.492337  | -0.420537 |
| 12 | -1.053759 | 1.240637  | -1.724094 |
| 8  | 0.861666  | 0.771876  | -1.691300 |
| 12 | 0.283907  | -1.133488 | -1.567364 |
| 8  | -1.628414 | -0.675670 | -2.088869 |
| 14 | -0.049181 | 0.016214  | 1.630106  |
| 8  | -0.800668 | 1.425031  | 2.034521  |
| 8  | -0.887353 | -0.293215 | 0.181368  |
| 8  | -0.046942 | -1.379958 | 2.393549  |

NCl-Fe8\_Q

|    |           |           |           |
|----|-----------|-----------|-----------|
| 8  | 1.362343  | -0.953594 | 0.961838  |
| 12 | 2.212056  | 1.849556  | 0.870744  |
| 8  | 3.344336  | 0.551176  | 0.041573  |
| 14 | 2.436689  | -0.664526 | -0.474359 |
| 8  | 2.728350  | -2.235813 | -0.687049 |
| 12 | 1.066116  | -2.782178 | 0.151306  |
| 8  | -0.674390 | -2.509206 | -0.569956 |
| 26 | -1.988532 | -1.582757 | 0.537787  |
| 8  | -3.108383 | -0.258109 | -0.352231 |
| 14 | -2.132243 | 0.975580  | -0.691029 |
| 8  | -2.224954 | 2.450394  | -0.069827 |
| 12 | -0.525778 | 2.581779  | 0.857570  |
| 8  | 1.021766  | 2.839259  | -0.269906 |
| 12 | 0.509152  | 1.622888  | -1.655936 |
| 8  | 1.386241  | -0.138381 | -1.675134 |

|            |           |           |           |
|------------|-----------|-----------|-----------|
| 12         | -0.417441 | -0.947193 | -1.702221 |
| 8          | -1.308970 | 0.828901  | -2.150676 |
| 14         | 0.078037  | -0.098141 | 1.595054  |
| 8          | 0.628291  | 1.373327  | 2.105189  |
| 8          | -0.641662 | 0.424965  | 0.136120  |
| 8          | -0.985741 | -1.088835 | 2.248141  |
| NCl-Fe8_S  |           |           |           |
| 8          | 0.970686  | -1.311357 | 0.974441  |
| 12         | 2.663507  | 1.151301  | 0.905629  |
| 8          | 3.305150  | -0.436451 | 0.052859  |
| 14         | 2.099486  | -1.360934 | -0.459851 |
| 8          | 1.942161  | -2.956851 | -0.632798 |
| 12         | 0.170715  | -2.970885 | 0.150147  |
| 8          | -1.424273 | -2.178165 | -0.536020 |
| 26         | -2.418437 | -1.055632 | 0.590878  |
| 8          | -2.822808 | 0.436279  | -0.473884 |
| 14         | -1.668552 | 1.552053  | -0.714120 |
| 8          | -1.486334 | 2.981794  | -0.016022 |
| 12         | 0.264257  | 2.670558  | 0.834190  |
| 8          | 1.860328  | 2.464508  | -0.250909 |
| 12         | 1.030924  | 1.373948  | -1.617242 |
| 8          | 1.245177  | -0.589914 | -1.676687 |
| 12         | -0.757637 | -0.723808 | -1.658797 |
| 8          | -0.932646 | 1.263321  | -2.189522 |
| 14         | 0.037412  | -0.052952 | 1.526845  |
| 8          | 0.999457  | 1.142573  | 2.133643  |
| 8          | -0.313588 | 0.730097  | 0.070893  |
| 8          | -1.360643 | -0.608489 | 2.085234  |
| NCl-Fe8_T  |           |           |           |
| 8          | 1.361005  | -0.989503 | 0.938460  |
| 12         | 2.249797  | 1.764672  | 0.911909  |
| 8          | 3.349597  | 0.476506  | 0.011402  |
| 14         | 2.413903  | -0.716152 | -0.513559 |
| 8          | 2.647300  | -2.295444 | -0.744042 |
| 12         | 0.972857  | -2.787516 | 0.116896  |
| 8          | -0.772891 | -2.426246 | -0.571367 |
| 26         | -2.006513 | -1.533524 | 0.561889  |
| 8          | -3.032500 | -0.273146 | -0.513033 |
| 14         | -2.101753 | 1.031253  | -0.697778 |
| 8          | -2.229660 | 2.459954  | 0.016097  |
| 12         | -0.490296 | 2.545741  | 0.904363  |
| 8          | 1.079581  | 2.817279  | -0.195498 |
| 12         | 0.587237  | 1.660942  | -1.638881 |
| 8          | 1.362118  | -0.145288 | -1.688125 |
| 12         | -0.488523 | -0.867915 | -1.695248 |
| 8          | -1.245695 | 0.971632  | -2.139553 |
| 14         | 0.090258  | -0.136771 | 1.582720  |
| 8          | 0.658740  | 1.300702  | 2.154368  |
| 8          | -0.630252 | 0.465769  | 0.164231  |
| 8          | -0.976997 | -1.164222 | 2.192440  |
| NCs-Fe13_Q |           |           |           |
| 8          | 1.969806  | -1.841699 | 0.047256  |
| 14         | 0.363082  | -1.745611 | -0.156873 |
| 8          | 0.312893  | -0.000555 | -0.275806 |
| 8          | -0.541111 | -2.345813 | -1.352031 |
| 8          | -0.696347 | 1.851030  | 1.142168  |
| 12         | -1.187183 | 0.004575  | 1.445670  |
| 14         | 0.376790  | 1.744464  | -0.155627 |



|            |           |           |           |
|------------|-----------|-----------|-----------|
| 8          | -0.709726 | -1.845551 | 1.142110  |
| 8          | 1.984064  | 1.827586  | 0.049292  |
| 12         | -2.117581 | 1.733372  | -0.441432 |
| 8          | -2.717780 | 0.009220  | 0.131313  |
| 8          | -0.521872 | 2.351117  | -1.351744 |
| 26         | 2.394015  | -0.008745 | 0.050761  |
| 12         | -2.132070 | -1.721219 | -0.438008 |
| NCs-Fe13_S |           |           |           |
| 8          | 1.990311  | -1.790892 | 0.301504  |
| 14         | 0.419804  | -1.685789 | -0.107029 |
| 8          | 0.516843  | 0.000066  | -0.588097 |
| 8          | -0.424328 | -2.414645 | -1.280701 |
| 8          | -0.735024 | 1.673655  | 1.117640  |
| 12         | -1.499653 | -0.000373 | 1.551238  |
| 14         | 0.418773  | 1.685860  | -0.107100 |
| 8          | -0.734099 | -1.673982 | 1.117654  |
| 8          | 1.989251  | 1.791957  | 0.301357  |
| 12         | -2.057294 | 1.702440  | -0.541137 |
| 8          | -2.770250 | -0.000707 | -0.000803 |
| 8          | -0.425764 | 2.414186  | -1.280818 |
| 26         | 2.321611  | 0.000633  | -0.004976 |
| 12         | -2.056176 | -1.703282 | -0.541326 |
| NCs-Fe13_T |           |           |           |
| 8          | 1.988469  | -1.824229 | 0.119871  |
| 14         | 0.396131  | -1.703522 | -0.171973 |
| 8          | 0.414280  | 0.000120  | -0.525787 |
| 8          | -0.506431 | -2.396828 | -1.320552 |
| 8          | -0.689368 | 1.731673  | 1.122688  |
| 12         | -1.354054 | -0.000860 | 1.540491  |
| 14         | 0.393873  | 1.703691  | -0.172205 |
| 8          | -0.687259 | -1.732540 | 1.122704  |
| 8          | 1.986084  | 1.826572  | 0.119535  |
| 12         | -2.099690 | 1.707787  | -0.469139 |
| 8          | -2.757808 | -0.001530 | 0.107027  |
| 8          | -0.509687 | 2.395903  | -1.320654 |
| 26         | 2.370981  | 0.001436  | 0.084646  |
| 12         | -2.097240 | -1.709662 | -0.469764 |
| NCs-Fe14_Q |           |           |           |
| 8          | -2.898800 | -0.832606 | 0.023563  |
| 14         | -1.901151 | 0.421335  | 0.227017  |
| 8          | -0.352744 | -0.415282 | -0.422578 |
| 8          | -1.806799 | 1.652778  | -0.847254 |
| 8          | 1.610245  | -0.863448 | 1.281953  |
| 12         | 0.502168  | 0.701487  | 1.659009  |
| 14         | 0.983158  | -1.536371 | -0.139638 |
| 8          | -1.392036 | 0.814737  | 1.712417  |
| 8          | 0.135361  | -2.909314 | -0.135046 |
| 12         | 2.712058  | 0.274810  | -0.024825 |
| 8          | 1.553923  | 1.770741  | 0.270546  |
| 8          | 2.145996  | -1.133424 | -1.199398 |
| 12         | -1.591490 | -2.143755 | -0.366904 |
| 26         | 0.054535  | 1.728713  | -0.842473 |
| NCs-Fe14_S |           |           |           |
| 8          | -0.529383 | 2.848922  | 0.182930  |
| 14         | 0.451774  | 1.599413  | -0.121055 |
| 8          | -0.752265 | 0.458336  | -0.541367 |
| 8          | 1.651829  | 1.428974  | -1.215996 |
| 8          | -1.033208 | -1.547953 | 1.132221  |

|            |           |           |           |
|------------|-----------|-----------|-----------|
| 12         | 0.673046  | -0.879606 | 1.606505  |
| 14         | -1.899539 | -0.784702 | -0.090468 |
| 8          | 1.292687  | 0.876704  | 1.166030  |
| 8          | -3.132673 | 0.204133  | 0.260562  |
| 12         | -0.012720 | -2.332675 | -0.626323 |
| 8          | 1.658130  | -1.713131 | 0.087866  |
| 8          | -1.766468 | -1.879924 | -1.279827 |
| 12         | -2.165070 | 1.845395  | 0.005338  |
| 26         | 2.277556  | -0.015839 | -0.277087 |
| Ncs-Fe14_T |           |           |           |
| 8          | -0.855133 | 2.801991  | 0.341015  |
| 14         | 0.285315  | 1.729220  | -0.056931 |
| 8          | -0.753796 | 0.455867  | -0.580875 |
| 8          | 1.503639  | 1.813276  | -1.132820 |
| 8          | -0.842589 | -1.624983 | 1.107758  |
| 12         | 0.809062  | -0.865878 | 1.650028  |
| 14         | -1.714902 | -0.941959 | -0.165106 |
| 8          | 1.172148  | 0.944911  | 1.166069  |
| 8          | -3.086689 | -0.145246 | 0.169541  |
| 12         | 0.269478  | -2.461465 | -0.505669 |
| 8          | 1.863894  | -1.634569 | 0.169046  |
| 8          | -1.415066 | -2.032548 | -1.329197 |
| 12         | -2.340753 | 1.614673  | 0.032983  |
| 26         | 2.094981  | 0.188492  | -0.396303 |
| NCs-Fe6_Q  |           |           |           |
| 8          | -2.298900 | 1.868682  | 0.309583  |
| 14         | -0.772994 | 1.689960  | -0.200951 |
| 8          | -0.870439 | 0.002625  | -0.592790 |
| 8          | 0.000384  | 2.398706  | -1.436728 |
| 8          | 0.471584  | -1.705711 | 0.952854  |
| 26         | 1.220182  | -0.003952 | 1.274458  |
| 14         | -0.783848 | -1.685342 | -0.200805 |
| 8          | 0.482386  | 1.702576  | 0.952949  |
| 8          | -2.310832 | -1.854177 | 0.309834  |
| 12         | 1.664842  | -1.697307 | -0.808158 |
| 8          | 2.445442  | -0.007544 | -0.340824 |
| 8          | -0.015145 | -2.398895 | -1.436733 |
| 12         | -2.771303 | 0.008747  | 0.177573  |
| 12         | 1.676060  | 1.687560  | -0.807455 |
| NCs-Fe16_S |           |           |           |
| 8          | -2.301380 | 1.848577  | 0.399852  |
| 14         | -0.811691 | 1.645160  | -0.200137 |
| 8          | -0.974708 | 0.000857  | -0.690513 |
| 8          | -0.057854 | 2.424022  | -1.406546 |
| 8          | 0.480133  | -1.561450 | 0.910249  |
| 26         | 1.384980  | -0.001448 | 1.239504  |
| 14         | -0.815124 | -1.643805 | -0.200027 |
| 8          | 0.483277  | 1.560418  | 0.910331  |
| 8          | -2.305203 | -1.844053 | 0.400024  |
| 12         | 1.619124  | -1.684024 | -0.826188 |
| 8          | 2.441221  | -0.002287 | -0.364969 |
| 8          | -0.062945 | -2.424123 | -1.406524 |
| 12         | -2.813238 | 0.002794  | 0.265170  |
| 12         | 1.622914  | 1.681479  | -0.825653 |
| NCs-Fe6_T  |           |           |           |
| 8          | 1.862074  | 2.305907  | 0.258683  |
| 14         | 1.718315  | 0.762449  | -0.206849 |
| 8          | -0.004021 | 0.784339  | -0.473221 |

|               |           |           |           |
|---------------|-----------|-----------|-----------|
| 8             | 2.376616  | 0.002106  | -1.475186 |
| 8             | -1.783675 | -0.512436 | 0.946411  |
| 26            | 0.005556  | -1.122103 | 1.229928  |
| 14            | -1.726093 | 0.745406  | -0.206694 |
| 8             | 1.788635  | -0.494609 | 0.946494  |
| 8             | -1.885051 | 2.287327  | 0.258945  |
| 12            | -1.718178 | -1.694011 | -0.755740 |
| 8             | 0.012007  | -2.377144 | -0.255029 |
| 8             | -2.376730 | -0.021283 | -1.475175 |
| 12            | -0.013619 | 2.727097  | 0.173967  |
| 12            | 1.735597  | -1.677166 | -0.755219 |
| H2_NCl-Fe12_Q |           |           |           |
| 8             | -1.615857 | -0.626643 | 1.070073  |
| 12            | 0.385223  | -2.673475 | 0.476669  |
| 8             | -1.380963 | -2.939245 | -0.205068 |
| 14            | -2.069525 | -1.509245 | -0.447142 |
| 8             | -3.594372 | -0.985947 | -0.404754 |
| 12            | -3.124402 | 0.634136  | 0.565633  |
| 8             | -2.110566 | 2.116200  | -0.080126 |
| 12            | -0.549302 | 2.640087  | 1.001613  |
| 8             | 0.956930  | 3.095831  | -0.159513 |
| 14            | 1.511663  | 1.693914  | -0.702696 |
| 8             | 2.911547  | 0.999382  | -0.293509 |
| 26            | 2.575213  | -0.755495 | 0.379348  |
| 8             | 1.697160  | -1.995111 | -0.775205 |
| 12            | 0.689876  | -0.769208 | -1.866084 |
| 8             | -1.262386 | -0.700218 | -1.680414 |
| 12            | -1.062994 | 1.267904  | -1.481503 |
| 8             | 0.877613  | 1.222775  | -2.187173 |
| 14            | -0.145402 | -0.007293 | 1.574904  |
| 8             | 0.900684  | -1.249253 | 1.798345  |
| 8             | 0.373778  | 0.590012  | 0.070845  |
| 8             | -0.365078 | 1.310038  | 2.451298  |
| 1             | 3.634746  | -1.278819 | 1.801059  |
| 1             | 4.086664  | -1.457465 | 1.190677  |
| H2_NCl-Fe12_S |           |           |           |
| 8             | -1.651298 | -0.454761 | 1.018682  |
| 12            | 0.096516  | -2.789680 | 0.411202  |
| 8             | -1.686160 | -2.752117 | -0.316627 |
| 14            | -2.191506 | -1.246078 | -0.513997 |
| 8             | -3.646126 | -0.543351 | -0.467098 |
| 12            | -2.990601 | 0.969841  | 0.556773  |
| 8             | -1.773305 | 2.316069  | -0.044827 |
| 12            | -0.209406 | 2.621989  | 1.101929  |
| 8             | 1.338844  | 2.908532  | -0.026707 |
| 14            | 1.756572  | 1.513617  | -0.685124 |
| 8             | 3.089869  | 0.636732  | -0.449333 |
| 26            | 2.235216  | -0.852647 | 0.449493  |
| 8             | 1.457020  | -2.136749 | -0.765963 |
| 12            | 0.645611  | -0.795629 | -1.843494 |
| 8             | -1.287641 | -0.471314 | -1.700279 |
| 12            | -0.941948 | 1.466243  | -1.567427 |
| 8             | 0.958980  | 1.198582  | -2.121376 |
| 14            | -0.138362 | -0.119441 | 1.625639  |
| 8             | 0.670461  | -1.523157 | 1.849322  |
| 8             | 0.698541  | 0.345851  | 0.192580  |
| 8             | -0.213910 | 1.224812  | 2.484337  |
| 1             | 3.635145  | -1.697014 | 0.227160  |

|               |           |           |           |
|---------------|-----------|-----------|-----------|
| 1             | 3.431122  | -1.873751 | 0.985311  |
| H2_NCl-Fe12_T |           |           |           |
| 8             | -1.621763 | -0.582560 | 1.086129  |
| 12            | 0.230859  | -2.704259 | 0.400485  |
| 8             | -1.557146 | -2.874616 | -0.244499 |
| 14            | -2.152609 | -1.396366 | -0.450868 |
| 8             | -3.636120 | -0.769211 | -0.370490 |
| 12            | -3.056838 | 0.788647  | 0.645517  |
| 8             | -1.983044 | 2.227693  | -0.004833 |
| 12            | -0.333052 | 2.614344  | 1.022252  |
| 8             | 1.219099  | 3.020011  | -0.113269 |
| 14            | 1.589940  | 1.597341  | -0.752525 |
| 8             | 2.917527  | 0.715932  | -0.497832 |
| 26            | 2.505136  | -0.927944 | 0.443650  |
| 8             | 1.591694  | -1.995825 | -0.797213 |
| 12            | 0.649346  | -0.731961 | -1.898718 |
| 8             | -1.308444 | -0.625101 | -1.678278 |
| 12            | -1.057000 | 1.336733  | -1.462576 |
| 8             | 0.836467  | 1.251491  | -2.215503 |
| 14            | -0.117269 | -0.032318 | 1.560557  |
| 8             | 0.869268  | -1.341657 | 1.740236  |
| 8             | 0.371412  | 0.604532  | 0.065719  |
| 8             | -0.238991 | 1.264910  | 2.481982  |
| 1             | 3.528528  | -0.675083 | 1.959148  |
| 1             | 3.977610  | -0.366416 | 1.404913  |
| H2_NCl-Fe14_Q |           |           |           |
| 8             | -1.775543 | 0.374240  | 0.944129  |
| 12            | -0.779016 | -2.332952 | 1.332774  |
| 8             | -2.387694 | -2.135265 | 0.328908  |
| 14            | -2.323485 | -0.712797 | -0.410519 |
| 8             | -3.459655 | 0.320887  | -0.900491 |
| 12            | -2.508659 | 1.872257  | -0.224301 |
| 8             | -0.862635 | 2.574076  | -0.873384 |
| 12            | 0.586386  | 2.835073  | 0.429072  |
| 8             | 2.288878  | 2.344291  | -0.389514 |
| 14            | 2.311550  | 0.741380  | -0.441722 |
| 8             | 3.229185  | -0.251732 | 0.426071  |
| 12            | 1.846521  | -1.227680 | 1.372936  |
| 8             | 0.878172  | -2.591244 | 0.374559  |
| 26            | 0.752642  | -1.631911 | -1.240588 |
| 8             | -1.056444 | -0.688657 | -1.501818 |
| 12            | -0.089140 | 1.006852  | -1.720307 |
| 8             | 1.701646  | 0.102090  | -1.872258 |
| 14            | -0.300566 | 0.572283  | 1.687412  |
| 8             | 0.094657  | -0.844263 | 2.442878  |
| 8             | 0.743841  | 0.403454  | 0.355157  |
| 8             | -0.088088 | 2.086487  | 2.144465  |
| 1             | 0.457369  | -2.727062 | -2.763785 |
| 1             | 1.225296  | -2.652920 | -2.785028 |
| H2_NCl-Fe14_S |           |           |           |
| 8             | -1.713866 | 0.286550  | 1.046287  |
| 12            | -0.848153 | -2.552401 | 0.964972  |
| 8             | -2.458492 | -2.060164 | 0.059126  |
| 14            | -2.350259 | -0.544093 | -0.438842 |
| 8             | -3.449582 | 0.600669  | -0.728924 |
| 12            | -2.396929 | 1.971964  | 0.146896  |
| 8             | -0.754137 | 2.714208  | -0.473226 |
| 12            | 0.729166  | 2.730785  | 0.802644  |

|               |           |           |           |
|---------------|-----------|-----------|-----------|
| 8             | 2.382441  | 2.218294  | -0.032343 |
| 14            | 2.313120  | 0.680285  | -0.465337 |
| 8             | 3.212597  | -0.510273 | 0.137194  |
| 12            | 1.874976  | -1.595403 | 1.085302  |
| 8             | 0.760900  | -2.729485 | -0.041883 |
| 26            | 0.596178  | -1.244413 | -1.250502 |
| 8             | -1.115082 | -0.345649 | -1.554973 |
| 12            | -0.142255 | 1.346840  | -1.713120 |
| 8             | 1.591544  | 0.455799  | -1.961384 |
| 14            | -0.193260 | 0.231221  | 1.713270  |
| 8             | 0.129217  | -1.276088 | 2.280105  |
| 8             | 0.768861  | 0.090620  | 0.288414  |
| 8             | 0.182110  | 1.646916  | 2.339124  |
| 1             | 0.653889  | -1.927812 | -2.766365 |
| 1             | 0.177325  | -2.413837 | -2.348324 |
| H2_NCl-Fe14_T |           |           |           |
| 8             | -1.850422 | 0.304229  | 0.868370  |
| 12            | -0.800323 | -2.385784 | 1.268412  |
| 8             | -2.399760 | -2.219861 | 0.241534  |
| 14            | -2.267843 | -0.808188 | -0.499608 |
| 8             | -3.348450 | 0.206149  | -1.131528 |
| 12            | -2.562626 | 1.787859  | -0.324669 |
| 8             | -0.917079 | 2.548517  | -0.890827 |
| 12            | 0.470700  | 2.818631  | 0.486971  |
| 8             | 2.247335  | 2.436307  | -0.257566 |
| 14            | 2.284957  | 0.836864  | -0.351404 |
| 8             | 3.182562  | -0.190612 | 0.499225  |
| 12            | 1.770857  | -1.182923 | 1.389615  |
| 8             | 0.874606  | -2.572833 | 0.351493  |
| 26            | 0.906824  | -1.568434 | -1.246924 |
| 8             | -0.884807 | -0.778807 | -1.455481 |
| 12            | -0.083204 | 1.004505  | -1.711355 |
| 8             | 1.736253  | 0.221663  | -1.821228 |
| 14            | -0.421340 | 0.555423  | 1.690112  |
| 8             | -0.010648 | -0.868571 | 2.420295  |
| 8             | 0.707191  | 0.494600  | 0.419045  |
| 8             | -0.312098 | 2.072302  | 2.174683  |
| 1             | 2.344016  | -2.242764 | -2.117673 |
| 1             | 1.995400  | -2.887437 | -1.861520 |
| H2_NCl-Fe16_Q |           |           |           |
| 8             | 1.606014  | -0.004346 | 1.150197  |
| 12            | 1.237542  | 2.741252  | 0.180241  |
| 8             | 2.765245  | 1.770464  | -0.444627 |
| 14            | 2.411751  | 0.206936  | -0.466471 |
| 8             | 3.305569  | -1.126705 | -0.293411 |
| 12            | 1.995034  | -1.961249 | 0.860628  |
| 8             | 0.252983  | -2.600302 | 0.398023  |
| 12            | -1.232374 | -1.892320 | 1.494166  |
| 8             | -2.773693 | -1.541153 | 0.369673  |
| 14            | -2.413513 | -0.174522 | -0.391416 |
| 8             | -3.108345 | 1.259396  | -0.191129 |
| 12            | -1.573661 | 2.308016  | 0.401762  |
| 8             | -0.298655 | 2.787525  | -0.970136 |
| 12            | -0.299206 | 1.089481  | -1.859818 |
| 8             | 1.200599  | -0.115264 | -1.572898 |
| 26            | -0.161495 | -1.650001 | -1.200928 |
| 8             | -1.647255 | -0.412992 | -1.872484 |
| 14            | 0.119809  | 0.469024  | 1.730434  |

|               |           |           |           |
|---------------|-----------|-----------|-----------|
| 8             | 0.047812  | 2.115198  | 1.749909  |
| 8             | -0.843321 | 0.218890  | 0.351947  |
| 8             | -0.424963 | -0.616214 | 2.770221  |
| 1             | -0.174638 | -2.853861 | -2.732575 |
| 1             | 0.536913  | -2.564382 | -2.744972 |
| H2_NCl-Fe16_S |           |           |           |
| 8             | 1.660970  | -0.110299 | 1.146392  |
| 12            | 1.098934  | 2.714155  | 0.468006  |
| 8             | 2.665485  | 1.920366  | -0.272514 |
| 14            | 2.394999  | 0.349819  | -0.451211 |
| 8             | 3.376488  | -0.922376 | -0.494788 |
| 12            | 2.144816  | -2.011816 | 0.525288  |
| 8             | 0.421260  | -2.645758 | 0.129171  |
| 12            | -1.120703 | -2.180974 | 1.244397  |
| 8             | -2.614204 | -1.766896 | 0.022846  |
| 14            | -2.394956 | -0.240949 | -0.441425 |
| 8             | -3.132095 | 1.057744  | 0.137303  |
| 12            | -1.670923 | 2.187938  | 0.671912  |
| 8             | -0.449073 | 2.859407  | -0.659644 |
| 12            | -0.340020 | 1.350713  | -1.839016 |
| 8             | 1.141075  | 0.120065  | -1.543945 |
| 26            | -0.184643 | -1.305791 | -1.182515 |
| 8             | -1.688150 | -0.082164 | -1.950015 |
| 14            | 0.134790  | 0.180148  | 1.737424  |
| 8             | -0.068031 | 1.808405  | 1.904788  |
| 8             | -0.755309 | -0.061452 | 0.287303  |
| 8             | -0.420815 | -0.984606 | 2.671620  |
| 1             | -0.064314 | -2.014457 | -2.687782 |
| 1             | 0.531317  | -2.340927 | -2.269001 |
| H2_NCl-Fe16_T |           |           |           |
| 8             | 1.667279  | 0.034358  | 1.099005  |
| 12            | 1.225209  | 2.778489  | 0.081761  |
| 8             | 2.655042  | 1.753084  | -0.677517 |
| 14            | 2.373068  | 0.184050  | -0.540033 |
| 8             | 3.335754  | -1.095766 | -0.387231 |
| 12            | 2.070782  | -1.946411 | 0.807561  |
| 8             | 0.336956  | -2.587045 | 0.405053  |
| 12            | -1.097492 | -1.848251 | 1.536711  |
| 8             | -2.687352 | -1.553955 | 0.463631  |
| 14            | -2.394383 | -0.177065 | -0.307397 |
| 8             | -3.128422 | 1.240469  | -0.129353 |
| 12            | -1.574236 | 2.312376  | 0.419686  |
| 8             | -0.351266 | 2.786268  | -1.006341 |
| 12            | -0.347448 | 1.057953  | -1.838401 |
| 8             | 1.070427  | -0.254649 | -1.522957 |
| 26            | -0.214076 | -1.702439 | -1.230746 |
| 8             | -1.676087 | -0.427567 | -1.813695 |
| 14            | 0.203538  | 0.535262  | 1.729695  |
| 8             | 0.152475  | 2.183489  | 1.725521  |
| 8             | -0.849135 | 0.309167  | 0.419648  |
| 8             | -0.287558 | -0.550967 | 2.795087  |
| 1             | -1.367338 | -2.917420 | -1.888117 |
| 1             | -0.844475 | -3.355571 | -1.518814 |
| H2_NCl-Fe2_Q  |           |           |           |
| 8             | -0.749661 | 1.412510  | 0.956300  |
| 26            | -2.548266 | -0.925589 | 0.278038  |
| 8             | -2.925877 | 0.789516  | -0.427810 |
| 14            | -1.577713 | 1.651631  | -0.620337 |

|              |           |           |           |
|--------------|-----------|-----------|-----------|
| 8            | -1.285521 | 3.236151  | -0.651276 |
| 12           | 0.327144  | 3.057019  | 0.421269  |
| 8            | 1.957526  | 2.225365  | -0.110978 |
| 12           | 2.663142  | 0.846446  | 1.097099  |
| 8            | 3.356780  | -0.632478 | 0.041881  |
| 14           | 2.106658  | -1.457864 | -0.532535 |
| 8            | 1.606413  | -2.917263 | -0.086935 |
| 12           | -0.163869 | -2.520414 | 0.626241  |
| 8            | -1.517178 | -2.146686 | -0.728338 |
| 12           | -0.391651 | -1.045291 | -1.831139 |
| 8            | -0.603670 | 0.903006  | -1.761702 |
| 12           | 1.362955  | 1.002575  | -1.491060 |
| 8            | 1.620971  | -0.938580 | -2.058653 |
| 14           | 0.048648  | 0.091967  | 1.592878  |
| 8            | -0.982911 | -1.145211 | 1.890421  |
| 8            | 0.752424  | -0.510877 | 0.158434  |
| 8            | 1.286614  | 0.589125  | 2.474656  |
| 1            | -4.008962 | -1.590997 | 1.314159  |
| 1            | -3.522329 | -1.344595 | 1.859852  |
| H2_NCl-Fe2_S |           |           |           |
| 8            | -0.510721 | 1.564914  | 0.979988  |
| 26           | -2.626084 | -0.776193 | 0.381672  |
| 8            | -2.773128 | 0.987714  | -0.231610 |
| 14           | -1.408883 | 1.788099  | -0.542338 |
| 8            | -1.032466 | 3.353990  | -0.651705 |
| 12           | 0.641117  | 3.090693  | 0.314453  |
| 8            | 2.162361  | 2.046549  | -0.170688 |
| 12           | 2.731912  | 0.610500  | 1.054132  |
| 8            | 3.280796  | -0.906778 | -0.032163 |
| 14           | 1.955258  | -1.645479 | -0.552947 |
| 8            | 1.359608  | -3.044991 | -0.038903 |
| 12           | -0.358909 | -2.493668 | 0.683494  |
| 8            | -1.718222 | -2.057026 | -0.626234 |
| 12           | -0.552104 | -0.991509 | -1.732396 |
| 8            | -0.545266 | 0.965008  | -1.722539 |
| 12           | 1.433498  | 0.851970  | -1.520244 |
| 8            | 1.462658  | -1.114478 | -2.069214 |
| 14           | 0.073437  | 0.135020  | 1.575708  |
| 8            | -1.155838 | -0.938563 | 1.792836  |
| 8            | 0.698815  | -0.567775 | 0.150153  |
| 8            | 1.369897  | 0.399078  | 2.469775  |
| 1            | -4.181537 | -1.053638 | -0.190058 |
| 1            | -3.751744 | -0.969274 | -0.850156 |
| H2_NCl-Fe2_T |           |           |           |
| 8            | -0.985585 | 1.219809  | 0.939246  |
| 26           | -2.341148 | -1.204748 | 0.370867  |
| 8            | -2.966830 | 0.318637  | -0.626575 |
| 14           | -1.774756 | 1.396888  | -0.698869 |
| 8            | -1.734068 | 3.006642  | -0.629525 |
| 12           | -0.133819 | 3.013815  | 0.477729  |
| 8            | 1.626423  | 2.450826  | -0.001316 |
| 12           | 2.477175  | 1.134360  | 1.182332  |
| 8            | 3.406147  | -0.189441 | 0.088973  |
| 14           | 2.291385  | -1.166090 | -0.530638 |
| 8            | 1.985243  | -2.695110 | -0.142893 |
| 12           | 0.168807  | -2.546287 | 0.534496  |
| 8            | -1.236940 | -2.184616 | -0.774000 |
| 12           | -0.235240 | -1.015165 | -1.907251 |

|              |           |           |           |
|--------------|-----------|-----------|-----------|
| 8            | -0.625557 | 0.891652  | -1.805697 |
| 12           | 1.288706  | 1.211993  | -1.450436 |
| 8            | 1.766521  | -0.676209 | -2.049822 |
| 14           | -0.007625 | 0.033346  | 1.585545  |
| 8            | -0.857408 | -1.360909 | 1.842102  |
| 8            | 0.829101  | -0.425262 | 0.179038  |
| 8            | 1.111072  | 0.675348  | 2.527897  |
| 1            | -3.607232 | -1.318457 | 1.738059  |
| 1            | -3.981478 | -0.891662 | 1.212999  |
| H2_NCl-Fe6_Q |           |           |           |
| 8            | -0.510721 | 1.564914  | 0.979988  |
| 26           | -2.626084 | -0.776193 | 0.381672  |
| 8            | -2.773128 | 0.987714  | -0.231610 |
| 14           | -1.408883 | 1.788099  | -0.542338 |
| 8            | -1.032466 | 3.353990  | -0.651705 |
| 12           | 0.641117  | 3.090693  | 0.314453  |
| 8            | 2.162361  | 2.046549  | -0.170688 |
| 12           | 2.731912  | 0.610500  | 1.054132  |
| 8            | 3.280796  | -0.906778 | -0.032163 |
| 14           | 1.955258  | -1.645479 | -0.552947 |
| 8            | 1.359608  | -3.044991 | -0.038903 |
| 12           | -0.358909 | -2.493668 | 0.683494  |
| 8            | -1.718222 | -2.057026 | -0.626234 |
| 12           | -0.552104 | -0.991509 | -1.732396 |
| 8            | -0.545266 | 0.965008  | -1.722539 |
| 12           | 1.433498  | 0.851970  | -1.520244 |
| 8            | 1.462658  | -1.114478 | -2.069214 |
| 14           | 0.073437  | 0.135020  | 1.575708  |
| 8            | -1.155838 | -0.938563 | 1.792836  |
| 8            | 0.698815  | -0.567775 | 0.150153  |
| 8            | 1.369897  | 0.399078  | 2.469775  |
| 1            | -4.181537 | -1.053638 | -0.190058 |
| 1            | -3.751744 | -0.969274 | -0.850156 |
| H2_NCl-Fe6_S |           |           |           |
| 8            | 1.362426  | 0.505965  | 0.930679  |
| 12           | -0.590454 | 2.844214  | 0.710532  |
| 8            | 1.152414  | 2.976419  | -0.060318 |
| 14           | 1.651851  | 1.524446  | -0.506470 |
| 8            | 3.139011  | 0.880810  | -0.677964 |
| 26           | 2.701180  | -0.714364 | 0.158060  |
| 8            | 1.483205  | -2.032939 | -0.335056 |
| 12           | 0.042082  | -2.595139 | 0.878069  |
| 8            | -1.555497 | -2.865625 | -0.202766 |
| 14           | -2.133545 | -1.420880 | -0.595825 |
| 8            | -3.445071 | -0.696406 | -0.017809 |
| 12           | -2.639985 | 0.879747  | 0.798849  |
| 8            | -2.047066 | 2.276795  | -0.405500 |
| 12           | -1.289240 | 1.111478  | -1.724588 |
| 8            | 0.669452  | 0.906383  | -1.707616 |
| 12           | 0.389071  | -1.048106 | -1.580238 |
| 8            | -1.578136 | -0.865672 | -2.084625 |
| 14           | -0.081041 | 0.020705  | 1.628249  |
| 8            | -0.978776 | 1.339227  | 2.038027  |
| 8            | -0.915152 | -0.375076 | 0.197515  |
| 8            | 0.077612  | -1.356041 | 2.407854  |
| 1            | 3.710476  | -1.467036 | -0.913823 |
| 1            | 4.084088  | -1.556341 | -0.209938 |
| H2_NCl-Fe6_T |           |           |           |



|              |           |           |           |
|--------------|-----------|-----------|-----------|
| 8            | 1.378519  | 0.453494  | 0.919838  |
| 12           | -0.501052 | 2.862818  | 0.720245  |
| 8            | 1.233299  | 2.950571  | -0.060069 |
| 14           | 1.734084  | 1.497490  | -0.500679 |
| 8            | 3.224210  | 0.870267  | -0.618414 |
| 26           | 2.656094  | -0.783745 | 0.121010  |
| 8            | 1.395817  | -2.147940 | -0.326655 |
| 12           | -0.055857 | -2.637337 | 0.874978  |
| 8            | -1.669734 | -2.806651 | -0.207920 |
| 14           | -2.195592 | -1.343338 | -0.601622 |
| 8            | -3.476734 | -0.576118 | -0.013106 |
| 12           | -2.612722 | 0.971498  | 0.791066  |
| 8            | -1.963619 | 2.344587  | -0.408584 |
| 12           | -1.213903 | 1.153503  | -1.712785 |
| 8            | 0.741381  | 0.861057  | -1.694179 |
| 12           | 0.330675  | -1.088457 | -1.553930 |
| 8            | -1.615965 | -0.805790 | -2.088440 |
| 14           | -0.085801 | 0.009909  | 1.613904  |
| 8            | -0.932115 | 1.358354  | 2.035843  |
| 8            | -0.930238 | -0.337734 | 0.180052  |
| 8            | 0.023914  | -1.374681 | 2.387076  |
| 1            | 3.773902  | -1.866151 | -0.577890 |
| 1            | 4.194383  | -1.512947 | -0.009227 |
| H2_NCl-Fe8_Q |           |           |           |
| 8            | 0.954287  | -1.355187 | 0.956890  |
| 12           | 2.725266  | 0.983326  | 0.995776  |
| 8            | 3.365932  | -0.611601 | 0.150090  |
| 14           | 2.121202  | -1.439487 | -0.429429 |
| 8            | 1.857341  | -3.013552 | -0.668773 |
| 12           | 0.069665  | -2.940876 | 0.086085  |
| 8            | -1.445659 | -2.060610 | -0.664965 |
| 26           | -2.543616 | -0.884937 | 0.438332  |
| 8            | -2.868657 | 0.752658  | -0.530163 |
| 14           | -1.556004 | 1.665260  | -0.744961 |
| 8            | -1.236921 | 3.074572  | -0.049946 |
| 12           | 0.409464  | 2.617982  | 0.899188  |
| 8            | 2.015117  | 2.356402  | -0.152680 |
| 12           | 1.176880  | 1.386166  | -1.581467 |
| 8            | 1.369048  | -0.574453 | -1.656498 |
| 12           | -0.609535 | -0.669253 | -1.739619 |
| 8            | -0.777223 | 1.315533  | -2.192089 |
| 14           | 0.020783  | -0.107137 | 1.550013  |
| 8            | 1.024208  | 1.057685  | 2.160600  |
| 8            | -0.332313 | 0.686868  | 0.087571  |
| 8            | -1.356960 | -0.667268 | 2.113302  |
| 1            | -3.761758 | -1.276205 | 1.806820  |
| 1            | -4.114410 | -1.592842 | 1.191565  |
| H2_NCl-Fe8_S |           |           |           |
| 8            | 0.869582  | 1.409699  | -0.978460 |
| 12           | 2.833894  | -0.773105 | -0.917230 |
| 8            | 3.302534  | 0.881907  | -0.074384 |
| 14           | 1.980054  | 1.619907  | 0.452812  |
| 8            | 1.585828  | 3.174275  | 0.632983  |
| 12           | -0.163926 | 2.939430  | -0.172705 |
| 8            | -1.630526 | 1.943793  | 0.525397  |
| 26           | -2.644910 | 0.721507  | -0.564523 |
| 8            | -2.748225 | -0.934872 | 0.377999  |
| 14           | -1.409788 | -1.780282 | 0.694941  |

|              |           |           |           |
|--------------|-----------|-----------|-----------|
| 8            | -0.975788 | -3.176324 | 0.034773  |
| 12           | 0.678667  | -2.617674 | -0.847732 |
| 8            | 2.226756  | -2.189594 | 0.236838  |
| 12           | 1.242408  | -1.251703 | 1.611409  |
| 8            | 1.256063  | 0.726664  | 1.673205  |
| 12           | -0.736590 | 0.621634  | 1.641845  |
| 8            | -0.744407 | -1.361538 | 2.180238  |
| 14           | 0.062226  | 0.058835  | -1.513226 |
| 8            | 1.160212  | -1.008035 | -2.134610 |
| 8            | -0.178267 | -0.753685 | -0.053649 |
| 8            | -1.405181 | 0.456107  | -2.011027 |
| 1            | -3.853725 | 1.076982  | 0.699700  |
| 1            | -4.235606 | 1.215258  | 0.033054  |
| H2_NCl-Fe8_T |           |           |           |
| 8            | 1.007181  | -1.345942 | 0.946107  |
| 12           | 2.670636  | 1.037678  | 1.039487  |
| 8            | 3.350726  | -0.482682 | 0.085370  |
| 14           | 2.136306  | -1.371708 | -0.474194 |
| 8            | 1.942701  | -2.957052 | -0.708847 |
| 12           | 0.158439  | -2.938583 | 0.055674  |
| 8            | -1.398878 | -2.063134 | -0.622111 |
| 26           | -2.481560 | -0.995023 | 0.493819  |
| 8            | -2.732720 | 0.498868  | -0.813488 |
| 14           | -1.571998 | 1.628345  | -0.780149 |
| 8            | -1.433952 | 2.991082  | 0.049160  |
| 12           | 0.286693  | 2.588714  | 0.936644  |
| 8            | 1.930669  | 2.417511  | -0.080999 |
| 12           | 1.209826  | 1.425471  | -1.563579 |
| 8            | 1.313383  | -0.539781 | -1.670681 |
| 12           | -0.703385 | -0.594579 | -1.723132 |
| 8            | -0.691145 | 1.439691  | -2.185446 |
| 14           | 0.024552  | -0.145853 | 1.543989  |
| 8            | 0.969113  | 1.033983  | 2.208432  |
| 8            | -0.344339 | 0.692399  | 0.116774  |
| 8            | -1.332318 | -0.792845 | 2.092601  |
| 1            | -4.056711 | -0.340633 | 1.099730  |
| 1            | -3.776618 | -0.700948 | 1.729829  |
| H2_NC8-Fe6_Q |           |           |           |
| 8            | 1.918860  | -1.838154 | -0.031690 |
| 14           | 0.308143  | -1.741788 | -0.186323 |
| 8            | 0.243400  | 0.000044  | -0.305421 |
| 8            | -0.631942 | -2.349345 | -1.351440 |
| 8            | -0.728397 | 1.846945  | 1.147262  |
| 12           | -1.197829 | -0.001808 | 1.462272  |
| 14           | 0.302843  | 1.741960  | -0.186904 |
| 8            | -0.723268 | -1.849174 | 1.147288  |
| 8            | 1.913347  | 1.843266  | -0.032544 |
| 12           | -2.199544 | 1.722592  | -0.388285 |
| 8            | -2.775695 | -0.003446 | 0.202275  |
| 8            | -0.639383 | 2.347167  | -1.351459 |
| 26           | 2.361808  | 0.003290  | -0.016622 |
| 12           | -2.193897 | -1.726801 | -0.390186 |
| 1            | 4.258733  | 0.379432  | 1.028766  |
| 1            | 4.260312  | -0.373608 | 1.028791  |
| H2_NC8-Fe6_S |           |           |           |
| 8            | -1.938621 | 1.787119  | 0.262146  |
| 14           | -0.359708 | 1.678124  | -0.120757 |
| 8            | -0.465988 | 0.000028  | -0.579943 |

|               |           |           |           |
|---------------|-----------|-----------|-----------|
| 8             | 0.497593  | 2.404371  | -1.286102 |
| 8             | 0.778028  | -1.671913 | 1.118926  |
| 12            | 1.543654  | 0.000043  | 1.563867  |
| 14            | -0.359970 | -1.678089 | -0.120566 |
| 8             | 0.778209  | 1.671956  | 1.118925  |
| 8             | -1.938953 | -1.786840 | 0.262140  |
| 12            | 2.121800  | -1.700053 | -0.524850 |
| 8             | 2.832607  | -0.000231 | 0.026787  |
| 8             | 0.496988  | -2.404687 | -1.285946 |
| 26            | -2.313293 | 0.000173  | -0.039089 |
| 12            | 2.122167  | 1.699675  | -0.524839 |
| 1             | -3.936294 | 0.000500  | 0.191197  |
| 1             | -3.612938 | 0.000110  | 0.938054  |
| H2_NCs-Fe6_T  |           |           |           |
| 8             | -1.937550 | 1.890654  | 0.081809  |
| 14            | -0.352576 | 1.739655  | -0.175637 |
| 8             | -0.474586 | 0.000289  | -0.446599 |
| 8             | 0.583022  | 2.349557  | -1.345113 |
| 8             | 0.736882  | -1.747563 | 1.112723  |
| 12            | 1.368227  | -0.001536 | 1.544839  |
| 14            | -0.356680 | -1.739576 | -0.175281 |
| 8             | 0.740527  | 1.745788  | 1.112775  |
| 8             | -1.941872 | -1.886700 | 0.082343  |
| 12            | 2.156718  | -1.710283 | -0.451678 |
| 8             | 2.796279  | -0.002593 | 0.133892  |
| 8             | 0.577484  | -2.350912 | -1.345168 |
| 26            | -2.277117 | 0.002433  | 0.039057  |
| 12            | 2.160868  | 1.707094  | -0.450570 |
| 1             | -3.868044 | 0.399886  | 0.548160  |
| 1             | -3.868593 | -0.395720 | 0.544839  |
| H2_NCs-Fe14_Q |           |           |           |
| 8             | 2.935224  | 0.767444  | -0.021231 |
| 14            | 1.887507  | -0.430289 | 0.267843  |
| 8             | 0.367809  | 0.421350  | -0.393352 |
| 8             | 1.736902  | -1.719272 | -0.722850 |
| 8             | -1.565702 | 1.091788  | 1.254048  |
| 12            | -0.498363 | -0.486640 | 1.710109  |
| 14            | -0.916488 | 1.619883  | -0.217241 |
| 8             | 1.384969  | -0.717083 | 1.780639  |
| 8             | -0.014083 | 2.953919  | -0.326183 |
| 12            | -2.712310 | -0.104102 | 0.044435  |
| 8             | -1.604182 | -1.611624 | 0.432078  |
| 8             | -2.097032 | 1.181536  | -1.243647 |
| 12            | 1.680138  | 2.104040  | -0.481157 |
| 26            | -0.139738 | -1.790655 | -0.739947 |
| 1             | -0.237849 | -3.730246 | -1.080330 |
| 1             | -0.508068 | -3.471096 | -1.746135 |
| H2_NCs-Fe14_S |           |           |           |
| 8             | -0.656168 | 2.838847  | 0.207792  |
| 14            | 0.370189  | 1.618926  | -0.065440 |
| 8             | -0.784753 | 0.451508  | -0.553421 |
| 8             | 1.613521  | 1.510508  | -1.123442 |
| 8             | -1.093425 | -1.558874 | 1.127885  |
| 12            | 0.575615  | -0.847772 | 1.675147  |
| 14            | -1.912385 | -0.823221 | -0.145423 |
| 8             | 1.183969  | 0.890880  | 1.218798  |
| 8             | -3.189451 | 0.130102  | 0.143710  |
| 12            | 0.023362  | -2.352685 | -0.552492 |

|               |           |           |           |
|---------------|-----------|-----------|-----------|
| 8             | 1.638625  | -1.648843 | 0.214016  |
| 8             | -1.693379 | -1.927424 | -1.314314 |
| 12            | -2.255997 | 1.797279  | -0.060904 |
| 26            | 2.275355  | 0.045293  | -0.236779 |
| 1             | 2.730850  | -0.554551 | -1.690790 |
| 1             | 3.433397  | -0.418417 | -1.310076 |
| H2_NCs-Fe14_T |           |           |           |
| 8             | -0.808751 | 2.826606  | 0.322037  |
| 14            | 0.306060  | 1.707665  | -0.020448 |
| 8             | -0.763167 | 0.471789  | -0.574037 |
| 8             | 1.557106  | 1.745881  | -1.061312 |
| 8             | -1.015291 | -1.590759 | 1.111053  |
| 12            | 0.637332  | -0.859085 | 1.690498  |
| 14            | -1.802551 | -0.882166 | -0.202792 |
| 8             | 1.139624  | 0.909283  | 1.216282  |
| 8             | -3.153672 | -0.026559 | 0.063805  |
| 12            | 0.135548  | -2.475617 | -0.450661 |
| 8             | 1.720552  | -1.666444 | 0.266440  |
| 8             | -1.495807 | -1.990494 | -1.348380 |
| 12            | -2.327270 | 1.699420  | -0.043742 |
| 26            | 2.152691  | 0.125358  | -0.310283 |
| 1             | 3.421292  | -0.220190 | -1.351131 |
| 1             | 2.767540  | -0.407123 | -1.776411 |
| H2_NCs-Fe6_Q  |           |           |           |
| 8             | 2.308656  | -1.860177 | 0.441276  |
| 14            | 0.830560  | -1.680891 | -0.195236 |
| 8             | 0.961350  | -0.002135 | -0.605667 |
| 8             | 0.150179  | -2.413045 | -1.467317 |
| 8             | -0.501988 | 1.656034  | 0.855080  |
| 26            | -1.311994 | 0.003374  | 1.268235  |
| 14            | 0.839135  | 1.677472  | -0.195169 |
| 8             | -0.510125 | -1.653344 | 0.855613  |
| 8             | 2.318044  | 1.849065  | 0.441490  |
| 12            | -1.551755 | 1.662176  | -0.988065 |
| 8             | -2.397519 | 0.005416  | -0.617358 |
| 8             | 0.162686  | 2.412606  | -1.467627 |
| 12            | 2.799025  | -0.006806 | 0.324931  |
| 12            | -1.561119 | -1.656463 | -0.986613 |
| 1             | -2.948569 | 0.009117  | 2.087609  |
| 1             | -2.479385 | 0.008788  | 2.717007  |
| H2_NCs-Fe6_S  |           |           |           |
| 8             | -2.286175 | 1.843032  | 0.433193  |
| 14            | -0.819329 | 1.648749  | -0.226931 |
| 8             | -0.993390 | -0.000503 | -0.701129 |
| 8             | -0.123810 | 2.428750  | -1.466604 |
| 8             | 0.527932  | -1.583076 | 0.819589  |
| 26            | 1.395575  | 0.000769  | 1.247564  |
| 14            | -0.817484 | -1.649619 | -0.227084 |
| 8             | 0.526365  | 1.583794  | 0.819353  |
| 8             | -2.284139 | -1.845621 | 0.432885  |
| 12            | 1.581848  | -1.684567 | -0.933977 |
| 8             | 2.356441  | 0.001241  | -0.458939 |
| 8             | -0.120773 | -2.428749 | -1.466574 |
| 12            | -2.801214 | -0.001543 | 0.299606  |
| 12            | 1.579613  | 1.686019  | -0.934506 |
| 1             | 1.110946  | 0.001089  | 2.889113  |
| 1             | 0.376903  | 0.001231  | 2.562748  |
| H2_NCs-Fe6_T  |           |           |           |

|    |           |           |           |
|----|-----------|-----------|-----------|
| 8  | 1.885705  | 2.275481  | 0.174123  |
| 14 | 1.742550  | 0.721842  | -0.260191 |
| 8  | 0.000242  | 0.734730  | -0.402756 |
| 8  | 2.337044  | -0.040717 | -1.554175 |
| 8  | -1.839646 | -0.543806 | 0.878798  |
| 26 | -0.000323 | -0.979482 | 1.239094  |
| 14 | -1.742060 | 0.722850  | -0.260230 |
| 8  | 1.839309  | -0.544848 | 0.878866  |
| 8  | -1.884331 | 2.276562  | 0.174117  |
| 12 | -1.729307 | -1.719324 | -0.777612 |
| 8  | -0.000694 | -2.311858 | -0.224009 |
| 8  | -2.336971 | -0.039335 | -1.554242 |
| 12 | 0.000806  | 2.693739  | 0.126368  |
| 12 | 1.728247  | -1.720306 | -0.777575 |
| 1  | -0.001064 | -0.473933 | 2.831118  |
| 1  | 0.000372  | 0.215774  | 2.418402  |
